# Supplementary material for: Will Nigerians Win the War Against Urinary Schistosomiasis? Prevalence, Intensity, Risk Factors and Knowledge Assessment among Some Rural Communities in Southwestern Nigeria
Source: PubMed Central journal article supplement (PMC7168148; doi:10.3390/pathogens9020128), 2020-02-17
Supplement: pathogens-09-00128-s001.pdf [file pathogens-09-00128-s001.pdf]

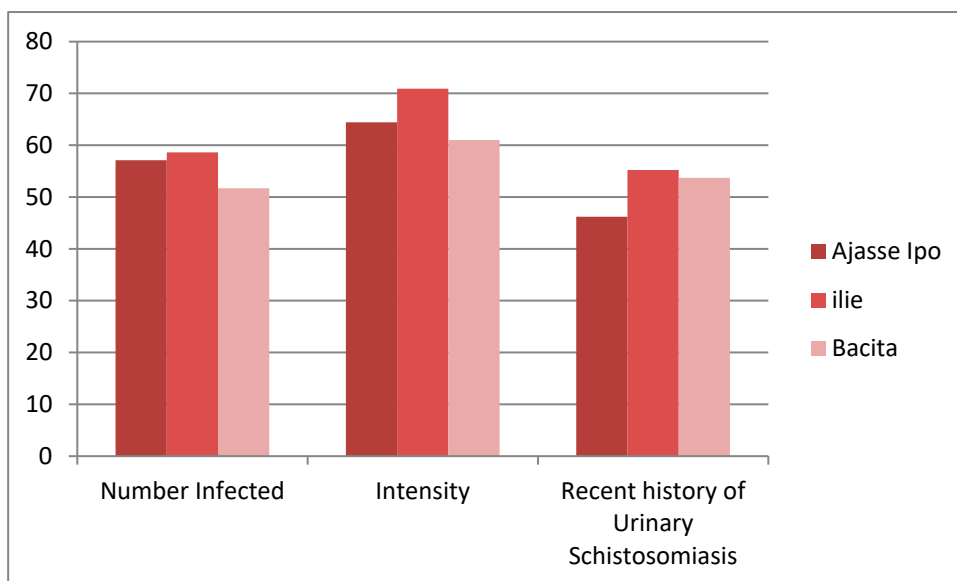

**Figure S1.** Prevalence, intensity and recent history of *S. haematobium* infection among sampled communities.

**Table S1.** Knowledge of urinary schistosomiasis with respect to age, sex, father's occupation, mother's occupation, father's education, mother's education, water contact activities and main source of water supply.

|                         |                     | main source of water supply          |       |       |        | Total |        |
|-------------------------|---------------------|--------------------------------------|-------|-------|--------|-------|--------|
|                         |                     | tap                                  | well  | river | others |       |        |
| prevention of infection | stop going to river | Count                                | 14    | 45    | 20     | 1     | 80     |
|                         |                     | Expected Count                       | 9.2   | 39.9  | 30.6   | .4    | 80.0   |
|                         |                     | % within prevention of infection     | 17.5% | 56.2% | 25.0%  | 1.2%  | 100.0% |
|                         |                     | % within main source of water supply | 19.7% | 14.6% | 8.4%   | 33.3% | 12.9%  |
|                         |                     | % of Total                           | 2.3%  | 7.3%  | 3.2%   | .2%   | 12.9%  |
| eating good food        |                     | Count                                | 18    | 101   | 69     | 0     | 188    |
|                         |                     | Expected Count                       | 21.5  | 93.7  | 71.9   | .9    | 188.0  |
|                         |                     | % within prevention of infection     | 9.6%  | 53.7% | 36.7%  | .0%   | 100.0% |
|                         |                     | % within main source of water supply | 25.4% | 32.7% | 29.1%  | .0%   | 30.3%  |
|                         |                     | % of Total                           | 2.9%  | 16.3% | 11.1%  | .0%   | 30.3%  |
| bathing regularly       |                     | Count                                | 5     | 23    | 35     | 0     | 63     |
|                         |                     | Expected Count                       | 7.2   | 31.4  | 24.1   | .3    | 63.0   |
|                         |                     | % within prevention of infection     | 7.9%  | 36.5% | 55.6%  | .0%   | 100.0% |
|                         |                     | % within main source of water supply | 7.0%  | 7.4%  | 14.8%  | .0%   | 10.2%  |
|                         |                     | % of Total                           | .8%   | 3.7%  | 5.6%   | .0%   | 10.2%  |
| treat drinking water    |                     | Count                                | 16    | 104   | 86     | 0     | 206    |
|                         |                     | Expected Count                       | 23.6  | 102.7 | 78.7   | 1.0   | 206.0  |
|                         |                     | % within prevention of infection     | 7.8%  | 50.5% | 41.7%  | .0%   | 100.0% |
|                         |                     | % within main source of water supply | 22.5% | 33.7% | 36.3%  | .0%   | 33.2%  |
|                         |                     | % of Total                           | 2.6%  | 16.8% | 13.9%  | .0%   | 33.2%  |
| i don't know            |                     | Count                                | 18    | 36    | 27     | 2     | 83     |

|       |                                      |        |        |        |        |        |
|-------|--------------------------------------|--------|--------|--------|--------|--------|
|       | Expected Count                       | 9.5    | 41.4   | 31.7   | .4     | 83.0   |
|       | % within prevention of infection     | 21.7%  | 43.4%  | 32.5%  | 2.4%   | 100.0% |
|       | % within main source of water supply | 25.4%  | 11.7%  | 11.4%  | 66.7%  | 13.4%  |
|       | % of Total                           | 2.9%   | 5.8%   | 4.4%   | .3%    | 13.4%  |
| Total | Count                                | 71     | 309    | 237    | 3      | 620    |
|       | Expected Count                       | 71.0   | 309.0  | 237.0  | 3.0    | 620.0  |
|       | % within prevention of infection     | 11.5%  | 49.8%  | 38.2%  | .5%    | 100.0% |
|       | % within main source of water supply | 100.0% | 100.0% | 100.0% | 100.0% | 100.0% |
|       | % of Total                           | 11.5%  | 49.8%  | 38.2%  | .5%    | 100.0% |

prevention of infection \* main source of water supply

|                         |                     |                                  | contact made with water |         |                   |          |            |        |
|-------------------------|---------------------|----------------------------------|-------------------------|---------|-------------------|----------|------------|--------|
|                         |                     |                                  | play or bath            | washing | agricultural work | fishin g | no contact | Total  |
| prevention of infection | stop going to river | Count                            | 23                      | 42      | 3                 | 1        | 11         | 80     |
|                         |                     | Expected Count                   | 17.7                    | 44.4    | 6.6               | 1.7      | 9.7        | 80.0   |
|                         |                     | % within prevention of infection | 28.8%                   | 52.5%   | 3.8%              | 1.2%     | 13.8%      | 100.0% |
|                         |                     | % within contact made with water | 16.8%                   | 12.2%   | 5.9%              | 7.7%     | 14.7%      | 12.9%  |
|                         |                     | % of Total                       | 3.7%                    | 6.8%    | .5%               | .2%      | 1.8%       | 12.9%  |
| eating good food        |                     | Count                            | 31                      | 104     | 19                | 7        | 27         | 188    |
|                         |                     | Expected Count                   | 41.5                    | 104.3   | 15.5              | 3.9      | 22.7       | 188.0  |
|                         |                     | % within prevention of infection | 16.5%                   | 55.3%   | 10.1%             | 3.7%     | 14.4%      | 100.0% |
|                         |                     | % within contact made with water | 22.6%                   | 30.2%   | 37.3%             | 53.8%    | 36.0%      | 30.3%  |
|                         |                     | % of Total                       | 5.0%                    | 16.8%   | 3.1%              | 1.1%     | 4.4%       | 30.3%  |
| bathing regularly       |                     | Count                            | 11                      | 33      | 9                 | 4        | 6          | 63     |
|                         |                     | Expected Count                   | 13.9                    | 35.0    | 5.2               | 1.3      | 7.6        | 63.0   |
|                         |                     | % within prevention of infection | 17.5%                   | 52.4%   | 14.3%             | 6.3%     | 9.5%       | 100.0% |
|                         |                     | % within contact made with water | 8.0%                    | 9.6%    | 17.6%             | 30.8%    | 8.0%       | 10.2%  |
|                         |                     | % of Total                       | 1.8%                    | 5.3%    | 1.5%              | .6%      | 1.0%       | 10.2%  |
| Count                   |                     |                                  | 44                      | 125     | 13                | 1        | 23         | 206    |

|                      |                                  |        |        |        |        |        |        |
|----------------------|----------------------------------|--------|--------|--------|--------|--------|--------|
| treat drinking water | Expected Count                   | 45.5   | 114.3  | 16.9   | 4.3    | 24.9   | 206.0  |
|                      | % within prevention of infection | 21.4%  | 60.7%  | 6.3%   | .5%    | 11.2%  | 100.0% |
|                      | % within contact made with water | 32.1%  | 36.3%  | 25.5%  | 7.7%   | 30.7%  | 33.2%  |
|                      | % of Total                       | 7.1%   | 20.2%  | 2.1%   | .2%    | 3.7%   | 33.2%  |
| i don't know         | Count                            | 28     | 40     | 7      | 0      | 8      | 83     |
|                      | Expected Count                   | 18.3   | 46.1   | 6.8    | 1.7    | 10.0   | 83.0   |
|                      | % within prevention of infection | 33.7%  | 48.2%  | 8.4%   | .0%    | 9.6%   | 100.0% |
|                      | % within contact made with water | 20.4%  | 11.6%  | 13.7%  | .0%    | 10.7%  | 13.4%  |
|                      | % of Total                       | 4.5%   | 6.5%   | 1.1%   | .0%    | 1.3%   | 13.4%  |
| Total                | Count                            | 137    | 344    | 51     | 13     | 75     | 620    |
|                      | Expected Count                   | 137.0  | 344.0  | 51.0   | 13.0   | 75.0   | 620.0  |
|                      | % within prevention of infection | 22.1%  | 55.5%  | 8.2%   | 2.1%   | 12.1%  | 100.0% |
|                      | % within contact made with water | 100.0% | 100.0% | 100.0% | 100.0% | 100.0% | 100.0% |
|                      | % of Total                       | 22.1%  | 55.5%  | 8.2%   | 2.1%   | 12.1%  | 100.0% |

**Chi-Square Tests**

|                              | Value               | df | Asymp. Sig. (2-sided) |
|------------------------------|---------------------|----|-----------------------|
| Pearson Chi-Square           | 37.678 <sup>a</sup> | 12 | .000                  |
| Likelihood Ratio             | 35.077              | 12 | .000                  |
| Linear-by-Linear Association | 1.086               | 1  | .297                  |
| N of Valid Cases             | 620                 |    |                       |

a. 5 cells (25.0%) have expected count less than 5. The minimum expected count is .30.

**prevention of infection \* contact made with water**

**Chi-Square Tests**

|                              | Value               | df | Asymp. Sig. (2-sided) |
|------------------------------|---------------------|----|-----------------------|
| Pearson Chi-Square           | 32.813 <sup>a</sup> | 16 | .008                  |
| Likelihood Ratio             | 32.874              | 16 | .008                  |
| Linear-by-Linear Association | 3.662               | 1  | .056                  |
| N of Valid Cases             | 620                 |    |                       |

a. 5 cells (20.0%) have expected count less than 5. The minimum expected count is 1.32.

|                         |                     |                                            | mother complete primary education |       | Total  |
|-------------------------|---------------------|--------------------------------------------|-----------------------------------|-------|--------|
|                         |                     |                                            | yes                               | no    |        |
| prevention of infection | stop going to river | Count                                      | 64                                | 16    | 80     |
|                         |                     | Expected Count                             | 55.7                              | 24.3  | 80.0   |
|                         |                     | % within prevention of infection           | 80.0%                             | 20.0% | 100.0% |
|                         |                     | % within mother complete primary education | 14.8%                             | 8.5%  | 12.9%  |
|                         |                     | % of Total                                 | 10.3%                             | 2.6%  | 12.9%  |
| eating good food        |                     | Count                                      | 123                               | 65    | 188    |
|                         |                     | Expected Count                             | 131.0                             | 57.0  | 188.0  |
|                         |                     | % within prevention of infection           | 65.4%                             | 34.6% | 100.0% |
|                         |                     | % within mother complete primary education | 28.5%                             | 34.6% | 30.3%  |
|                         |                     | % of Total                                 | 19.8%                             | 10.5% | 30.3%  |
| bathing regularly       |                     | Count                                      | 34                                | 29    | 63     |
|                         |                     | Expected Count                             | 43.9                              | 19.1  | 63.0   |
|                         |                     | % within prevention of infection           | 54.0%                             | 46.0% | 100.0% |
|                         |                     | % within mother complete primary education | 7.9%                              | 15.4% | 10.2%  |
|                         |                     | % of Total                                 | 5.5%                              | 4.7%  | 10.2%  |
| treat drinking water    |                     | Count                                      | 139                               | 67    | 206    |
|                         |                     | Expected Count                             | 143.5                             | 62.5  | 206.0  |
|                         |                     | % within prevention of infection           | 67.5%                             | 32.5% | 100.0% |

|              |                                            |        |        |        |
|--------------|--------------------------------------------|--------|--------|--------|
|              | % within mother complete primary education | 32.2%  | 35.6%  | 33.2%  |
|              | % of Total                                 | 22.4%  | 10.8%  | 33.2%  |
| i don't know | Count                                      | 72     | 11     | 83     |
|              | Expected Count                             | 57.8   | 25.2   | 83.0   |
|              | % within prevention of infection           | 86.7%  | 13.3%  | 100.0% |
|              | % within mother complete primary education | 16.7%  | 5.9%   | 13.4%  |
|              | % of Total                                 | 11.6%  | 1.8%   | 13.4%  |
| Total        | Count                                      | 432    | 188    | 620    |
|              | Expected Count                             | 432.0  | 188.0  | 620.0  |
|              | % within prevention of infection           | 69.7%  | 30.3%  | 100.0% |
|              | % within mother complete primary education | 100.0% | 100.0% | 100.0% |
|              | % of Total                                 | 69.7%  | 30.3%  | 100.0% |

**prevention of infection \* mother complete primary education**



### Chi-Square Tests

|                              | Value               | df | Asymp. Sig. (2-sided) |
|------------------------------|---------------------|----|-----------------------|
| Pearson Chi-Square           | 24.921 <sup>a</sup> | 4  | .000                  |
| Likelihood Ratio             | 26.586              | 4  | .000                  |
| Linear-by-Linear Association | 1.055               | 1  | .304                  |
| N of Valid Cases             | 620                 |    |                       |

a. 0 cells (.0%) have expected count less than 5. The minimum expected count is 19.10.

**prevention of infection \* father complete primary education**

Crosstab

|                         |                      | father complete primary education          |       |       |        |
|-------------------------|----------------------|--------------------------------------------|-------|-------|--------|
|                         |                      | yes                                        | no    | Total |        |
| prevention of infection | stop going to river  | Count                                      | 73    | 7     | 80     |
|                         |                      | Expected Count                             | 61.5  | 18.5  | 80.0   |
|                         |                      | % within prevention of infection           | 91.2% | 8.8%  | 100.0% |
|                         |                      | % within father complete primary education | 15.3% | 4.9%  | 12.9%  |
|                         |                      | % of Total                                 | 11.8% | 1.1%  | 12.9%  |
|                         | eating good food     | Count                                      | 140   | 48    | 188    |
|                         |                      | Expected Count                             | 144.6 | 43.4  | 188.0  |
|                         |                      | % within prevention of infection           | 74.5% | 25.5% | 100.0% |
|                         |                      | % within father complete primary education | 29.4% | 33.6% | 30.3%  |
|                         |                      | % of Total                                 | 22.6% | 7.7%  | 30.3%  |
|                         | bathing regularly    | Count                                      | 34    | 29    | 63     |
|                         |                      | Expected Count                             | 48.5  | 14.5  | 63.0   |
|                         |                      | % within prevention of infection           | 54.0% | 46.0% | 100.0% |
|                         |                      | % within father complete primary education | 7.1%  | 20.3% | 10.2%  |
|                         |                      | % of Total                                 | 5.5%  | 4.7%  | 10.2%  |
|                         | treat drinking water | Count                                      | 153   | 53    | 206    |
|                         |                      | Expected Count                             | 158.5 | 47.5  | 206.0  |
|                         |                      | % within prevention of infection           | 74.3% | 25.7% | 100.0% |

|              |                                            |        |        |        |
|--------------|--------------------------------------------|--------|--------|--------|
|              | % within father complete primary education | 32.1%  | 37.1%  | 33.2%  |
|              | % of Total                                 | 24.7%  | 8.5%   | 33.2%  |
| i don't know | Count                                      | 77     | 6      | 83     |
|              | Expected Count                             | 63.9   | 19.1   | 83.0   |
|              | % within prevention of infection           | 92.8%  | 7.2%   | 100.0% |
|              | % within father complete primary education | 16.1%  | 4.2%   | 13.4%  |
|              | % of Total                                 | 12.4%  | 1.0%   | 13.4%  |
| Total        | Count                                      | 477    | 143    | 620    |
|              | Expected Count                             | 477.0  | 143.0  | 620.0  |
|              | % within prevention of infection           | 76.9%  | 23.1%  | 100.0% |
|              | % within father complete primary education | 100.0% | 100.0% | 100.0% |
|              | % of Total                                 | 76.9%  | 23.1%  | 100.0% |

#### Chi-Square Tests

|                              | Value               | df | Asymp. Sig. (2-sided) |
|------------------------------|---------------------|----|-----------------------|
| Pearson Chi-Square           | 41.164 <sup>a</sup> | 4  | .000                  |
| Likelihood Ratio             | 43.647              | 4  | .000                  |
| Linear-by-Linear Association | .035                | 1  | .852                  |
| N of Valid Cases             | 620                 |    |                       |

a. 0 cells (.0%) have expected count less than 5. The minimum expected count is 14.53.

|                            |                        |                                        | mother's occupation |         |               |            | Total  |
|----------------------------|------------------------|----------------------------------------|---------------------|---------|---------------|------------|--------|
|                            |                        |                                        | trading             | farming | salary earner | unemployed |        |
| prevention of<br>infection | stop going<br>to river | Count                                  | 52                  | 11      | 13            | 4          | 80     |
|                            |                        | Expected Count                         | 37.5                | 17.8    | 16.6          | 8.0        | 80.0   |
|                            |                        | % within<br>prevention of<br>infection | 65.0%               | 13.8%   | 16.2%         | 5.0%       | 100.0% |
|                            |                        | % within<br>mother's<br>occupation     | 17.9%               | 8.0%    | 10.1%         | 6.5%       | 12.9%  |
|                            |                        | % of Total                             | 8.4%                | 1.8%    | 2.1%          | .6%        | 12.9%  |
| eating<br>good food        |                        | Count                                  | 83                  | 49      | 35            | 21         | 188    |
|                            |                        | Expected Count                         | 88.2                | 41.8    | 39.1          | 18.8       | 188.0  |
|                            |                        | % within<br>prevention of<br>infection | 44.1%               | 26.1%   | 18.6%         | 11.2%      | 100.0% |
|                            |                        | % within<br>mother's<br>occupation     | 28.5%               | 35.5%   | 27.1%         | 33.9%      | 30.3%  |
|                            |                        | % of Total                             | 13.4%               | 7.9%    | 5.6%          | 3.4%       | 30.3%  |
| bathing<br>regularly       |                        | Count                                  | 22                  | 27      | 11            | 3          | 63     |
|                            |                        | Expected Count                         | 29.6                | 14.0    | 13.1          | 6.3        | 63.0   |
|                            |                        | % within<br>prevention of<br>infection | 34.9%               | 42.9%   | 17.5%         | 4.8%       | 100.0% |
|                            |                        | % within<br>mother's<br>occupation     | 7.6%                | 19.6%   | 8.5%          | 4.8%       | 10.2%  |
|                            |                        | % of Total                             | 3.5%                | 4.4%    | 1.8%          | .5%        | 10.2%  |
| treat<br>drinking<br>water |                        | Count                                  | 86                  | 46      | 44            | 30         | 206    |
|                            |                        | Expected Count                         | 96.7                | 45.9    | 42.9          | 20.6       | 206.0  |

|              |                                  |        |        |        |        |        |
|--------------|----------------------------------|--------|--------|--------|--------|--------|
|              | % within prevention of infection | 41.7%  | 22.3%  | 21.4%  | 14.6%  | 100.0% |
|              | % within mother's occupation     | 29.6%  | 33.3%  | 34.1%  | 48.4%  | 33.2%  |
|              | % of Total                       | 13.9%  | 7.4%   | 7.1%   | 4.8%   | 33.2%  |
| i don't know | Count                            | 48     | 5      | 26     | 4      | 83     |
|              | Expected Count                   | 39.0   | 18.5   | 17.3   | 8.3    | 83.0   |
|              | % within prevention of infection | 57.8%  | 6.0%   | 31.3%  | 4.8%   | 100.0% |
|              | % within mother's occupation     | 16.5%  | 3.6%   | 20.2%  | 6.5%   | 13.4%  |
|              | % of Total                       | 7.7%   | .8%    | 4.2%   | .6%    | 13.4%  |
| Total        | Count                            | 291    | 138    | 129    | 62     | 620    |
|              | Expected Count                   | 291.0  | 138.0  | 129.0  | 62.0   | 620.0  |
|              | % within prevention of infection | 46.9%  | 22.3%  | 20.8%  | 10.0%  | 100.0% |
|              | % within mother's occupation     | 100.0% | 100.0% | 100.0% | 100.0% | 100.0% |
|              | % of Total                       | 46.9%  | 22.3%  | 20.8%  | 10.0%  | 100.0% |

**prevention of infection \* mother's occupation**

|                         |                     | father's occupation              |         |         |               |             | Total |        |
|-------------------------|---------------------|----------------------------------|---------|---------|---------------|-------------|-------|--------|
|                         |                     | fishing                          | farming | trading | salary earner | wage earner |       |        |
| prevention of infection | stop going to river | Count                            | 2       | 29      | 27            | 19          | 3     | 80     |
|                         |                     | Expected Count                   | 1.9     | 33.9    | 20.8          | 17.0        | 6.3   | 80.0   |
|                         |                     | % within prevention of infection | 2.5%    | 36.2%   | 33.8%         | 23.8%       | 3.8%  | 100.0% |
|                         |                     | % within father's occupation     | 13.3%   | 11.0%   | 16.8%         | 14.4%       | 6.1%  | 12.9%  |
|                         |                     | % of Total                       | .3%     | 4.7%    | 4.4%          | 3.1%        | .5%   | 12.9%  |
| eating good food        |                     | Count                            | 8       | 80      | 41            | 40          | 19    | 188    |
|                         |                     | Expected Count                   | 4.5     | 79.7    | 48.8          | 40.0        | 14.9  | 188.0  |
|                         |                     | % within prevention of infection | 4.3%    | 42.6%   | 21.8%         | 21.3%       | 10.1% | 100.0% |
|                         |                     | % within father's occupation     | 53.3%   | 30.4%   | 25.5%         | 30.3%       | 38.8% | 30.3%  |
|                         |                     | % of Total                       | 1.3%    | 12.9%   | 6.6%          | 6.5%        | 3.1%  | 30.3%  |
| bathing regularly       |                     | Count                            | 3       | 41      | 11            | 5           | 3     | 63     |
|                         |                     | Expected Count                   | 1.5     | 26.7    | 16.4          | 13.4        | 5.0   | 63.0   |
|                         |                     | % within prevention of infection | 4.8%    | 65.1%   | 17.5%         | 7.9%        | 4.8%  | 100.0% |
|                         |                     | % within father's occupation     | 20.0%   | 15.6%   | 6.8%          | 3.8%        | 6.1%  | 10.2%  |
|                         |                     | % of Total                       | .5%     | 6.6%    | 1.8%          | .8%         | .5%   | 10.2%  |
| treat drinking water    |                     | Count                            | 2       | 86      | 56            | 44          | 18    | 206    |
|                         |                     | Expected Count                   | 5.0     | 87.4    | 53.5          | 43.9        | 16.3  | 206.0  |
|                         |                     | % within prevention of infection | 1.0%    | 41.7%   | 27.2%         | 21.4%       | 8.7%  | 100.0% |

|              |                                  |        |        |        |        |        |        |
|--------------|----------------------------------|--------|--------|--------|--------|--------|--------|
|              | % within father's occupation     | 13.3%  | 32.7%  | 34.8%  | 33.3%  | 36.7%  | 33.2%  |
|              | % of Total                       | 13.3%  | 13.9%  | 9.0%   | 7.1%   | 2.9%   | 33.2%  |
| i don't know | Count                            | 10     | 27     | 26     | 24     | 6      | 83     |
|              | Expected Count                   | 12.0   | 35.2   | 21.6   | 17.7   | 6.6    | 83.0   |
|              | % within prevention of infection | 10.0%  | 32.5%  | 31.3%  | 28.9%  | 7.2%   | 100.0% |
|              | % within father's occupation     | 10.0%  | 10.3%  | 16.1%  | 18.2%  | 12.2%  | 13.4%  |
|              | % of Total                       | 10.0%  | 4.4%   | 4.2%   | 3.9%   | 1.0%   | 13.4%  |
| Total        | Count                            | 15     | 263    | 161    | 132    | 49     | 620    |
|              | Expected Count                   | 15.0   | 263.0  | 161.0  | 132.0  | 49.0   | 620.0  |
|              | % within prevention of infection | 2.4%   | 42.4%  | 26.0%  | 21.3%  | 7.9%   | 100.0% |
|              | % within father's occupation     | 100.0% | 100.0% | 100.0% | 100.0% | 100.0% | 100.0% |
|              | % of Total                       | 2.4%   | 42.4%  | 26.0%  | 21.3%  | 7.9%   | 100.0% |

### Chi-Square Tests

|                              | Value               | df | Asymp. Sig. (2-sided) |
|------------------------------|---------------------|----|-----------------------|
| Pearson Chi-Square           | 53.272 <sup>a</sup> | 12 | .000                  |
| Likelihood Ratio             | 54.949              | 12 | .000                  |
| Linear-by-Linear Association | 3.147               | 1  | .076                  |
| N of Valid Cases             | 620                 |    |                       |

### Chi-Square Tests

|                              | Value               | df | Asymp. Sig. (2-sided) |
|------------------------------|---------------------|----|-----------------------|
| Pearson Chi-Square           | 53.272 <sup>a</sup> | 12 | .000                  |
| Likelihood Ratio             | 54.949              | 12 | .000                  |
| Linear-by-Linear Association | 3.147               | 1  | .076                  |

a. 0 cells (.0%) have expected count less than 5. The minimum expected count is 6.30.

**prevention of infection \* father's occupation**

### Chi-Square Tests

|                              | Value               | df | Asymp. Sig. (2-sided) |
|------------------------------|---------------------|----|-----------------------|
| Pearson Chi-Square           | 35.722 <sup>a</sup> | 16 | .003                  |
| Likelihood Ratio             | 38.562              | 16 | .001                  |
| Linear-by-Linear Association | 1.815               | 1  | .178                  |
| N of Valid Cases             | 620                 |    |                       |

a. 6 cells (24.0%) have expected count less than 5. The minimum expected count is 1.52.

**prevention of infection \* sex**



Crosstab

|                         |                     |                                  | sex   |        |        |
|-------------------------|---------------------|----------------------------------|-------|--------|--------|
|                         |                     |                                  | male  | female | Total  |
| prevention of infection | stop going to river | Count                            | 48    | 32     | 80     |
|                         |                     | Expected Count                   | 46.7  | 33.3   | 80.0   |
|                         |                     | % within prevention of infection | 60.0% | 40.0%  | 100.0% |
|                         |                     | % within sex                     | 13.3% | 12.4%  | 12.9%  |
|                         |                     | % of Total                       | 7.7%  | 5.2%   | 12.9%  |
| eating good food        |                     | Count                            | 110   | 78     | 188    |
|                         |                     | Expected Count                   | 109.8 | 78.2   | 188.0  |
|                         |                     | % within prevention of infection | 58.5% | 41.5%  | 100.0% |
|                         |                     | % within sex                     | 30.4% | 30.2%  | 30.3%  |
|                         |                     | % of Total                       | 17.7% | 12.6%  | 30.3%  |
| bathing regularly       |                     | Count                            | 42    | 21     | 63     |
|                         |                     | Expected Count                   | 36.8  | 26.2   | 63.0   |
|                         |                     | % within prevention of infection | 66.7% | 33.3%  | 100.0% |
|                         |                     | % within sex                     | 11.6% | 8.1%   | 10.2%  |
|                         |                     | % of Total                       | 6.8%  | 3.4%   | 10.2%  |
| treat drinking water    |                     | Count                            | 118   | 88     | 206    |
|                         |                     | Expected Count                   | 120.3 | 85.7   | 206.0  |
|                         |                     | % within prevention of infection | 57.3% | 42.7%  | 100.0% |
|                         |                     | % within sex                     | 32.6% | 34.1%  | 33.2%  |
|                         |                     | % of Total                       | 19.0% | 14.2%  | 33.2%  |

|              |                                  |        |        |        |
|--------------|----------------------------------|--------|--------|--------|
| i don't know | Count                            | 44     | 39     | 83     |
|              | Expected Count                   | 48.5   | 34.5   | 83.0   |
|              | % within prevention of infection | 53.0%  | 47.0%  | 100.0% |
|              | % within sex                     | 12.2%  | 15.1%  | 13.4%  |
|              | % of Total                       | 7.1%   | 6.3%   | 13.4%  |
| Total        | Count                            | 362    | 258    | 620    |
|              | Expected Count                   | 362.0  | 258.0  | 620.0  |
|              | % within prevention of infection | 58.4%  | 41.6%  | 100.0% |
|              | % within sex                     | 100.0% | 100.0% | 100.0% |
|              | % of Total                       | 58.4%  | 41.6%  | 100.0% |

#### Chi-Square Tests

|                              | Value              | df | Asymp. Sig. (2-sided) |
|------------------------------|--------------------|----|-----------------------|
| Pearson Chi-Square           | 2.955 <sup>a</sup> | 4  | .565                  |
| Likelihood Ratio             | 2.989              | 4  | .560                  |
| Linear-by-Linear Association | .772               | 1  | .380                  |
| N of Valid Cases             | 620                |    |                       |

a. 0 cells (.0%) have expected count less than 5. The minimum expected count is 26.22.

**prevention of infection \* Age distribution**

Crosstab

|                         |                      |                                  | Age distribution |       |         |         |       | Total  |
|-------------------------|----------------------|----------------------------------|------------------|-------|---------|---------|-------|--------|
|                         |                      |                                  | <_4              | 5 - 9 | 10 - 14 | 15 - 19 | >_20  |        |
| prevention of infection | stop going to river  | Count                            | 7                | 6     | 41      | 26      | 0     | 80     |
|                         |                      | Expected Count                   | 2.2              | 20.1  | 34.8    | 21.7    | 1.2   | 80.0   |
|                         |                      | % within prevention of infection | 8.8%             | 7.5%  | 51.2%   | 32.5%   | .0%   | 100.0% |
|                         |                      | % within Age distribution        | 41.2%            | 3.8%  | 15.2%   | 15.5%   | .0%   | 12.9%  |
|                         |                      | % of Total                       | 1.1%             | 1.0%  | 6.6%    | 4.2%    | .0%   | 12.9%  |
|                         | eating good food     | Count                            | 4                | 55    | 76      | 52      | 1     | 188    |
|                         |                      | Expected Count                   | 5.2              | 47.3  | 81.9    | 50.9    | 2.7   | 188.0  |
|                         |                      | % within prevention of infection | 2.1%             | 29.3% | 40.4%   | 27.7%   | .5%   | 100.0% |
|                         |                      | % within Age distribution        | 23.5%            | 35.3% | 28.1%   | 31.0%   | 11.1% | 30.3%  |
|                         |                      | % of Total                       | .6%              | 8.9%  | 12.3%   | 8.4%    | .2%   | 30.3%  |
|                         | bathing regularly    | Count                            | 2                | 14    | 30      | 15      | 2     | 63     |
|                         |                      | Expected Count                   | 1.7              | 15.9  | 27.4    | 17.1    | .9    | 63.0   |
|                         |                      | % within prevention of infection | 3.2%             | 22.2% | 47.6%   | 23.8%   | 3.2%  | 100.0% |
|                         |                      | % within Age distribution        | 11.8%            | 9.0%  | 11.1%   | 8.9%    | 22.2% | 10.2%  |
|                         |                      | % of Total                       | .3%              | 2.3%  | 4.8%    | 2.4%    | .3%   | 10.2%  |
|                         | treat drinking water | Count                            | 4                | 65    | 81      | 52      | 4     | 206    |
|                         |                      | Expected Count                   | 5.6              | 51.8  | 89.7    | 55.8    | 3.0   | 206.0  |
|                         |                      | % within prevention of infection | 1.9%             | 31.6% | 39.3%   | 25.2%   | 1.9%  | 100.0% |

|              |                                  |        |        |        |        |        |        |
|--------------|----------------------------------|--------|--------|--------|--------|--------|--------|
|              | % within Age distribution        | 23.5%  | 41.7%  | 30.0%  | 31.0%  | 44.4%  | 33.2%  |
|              | % of Total                       | .6%    | 10.5%  | 13.1%  | 8.4%   | .6%    | 33.2%  |
| i don't know | Count                            | 0      | 16     | 42     | 23     | 2      | 83     |
|              | Expected Count                   | 2.3    | 20.9   | 36.1   | 22.5   | 1.2    | 83.0   |
|              | % within prevention of infection | .0%    | 19.3%  | 50.6%  | 27.7%  | 2.4%   | 100.0% |
|              | % within Age distribution        | .0%    | 10.3%  | 15.6%  | 13.7%  | 22.2%  | 13.4%  |
|              | % of Total                       | .0%    | 2.6%   | 6.8%   | 3.7%   | .3%    | 13.4%  |
| Total        | Count                            | 17     | 156    | 270    | 168    | 9      | 620    |
|              | Expected Count                   | 17.0   | 156.0  | 270.0  | 168.0  | 9.0    | 620.0  |
|              | % within prevention of infection | 2.7%   | 25.2%  | 43.5%  | 27.1%  | 1.5%   | 100.0% |
|              | % within Age distribution        | 100.0% | 100.0% | 100.0% | 100.0% | 100.0% | 100.0% |
|              | % of Total                       | 2.7%   | 25.2%  | 43.5%  | 27.1%  | 1.5%   | 100.0% |

|                       |                |                                      | main source of water supply |       |       |        |        |
|-----------------------|----------------|--------------------------------------|-----------------------------|-------|-------|--------|--------|
|                       |                |                                      | tap                         | well  | river | others | Total  |
| symptoms of infection | blood in urine | Count                                | 17                          | 99    | 96    | 1      | 213    |
|                       |                | Expected Count                       | 24.4                        | 106.2 | 81.4  | 1.0    | 213.0  |
|                       |                | % within symptoms of infection       | 8.0%                        | 46.5% | 45.1% | .5%    | 100.0% |
|                       |                | % within main source of water supply | 23.9%                       | 32.0% | 40.5% | 33.3%  | 34.4%  |
|                       |                | % of Total                           | 2.7%                        | 16.0% | 15.5% | .2%    | 34.4%  |
| stomach pain          |                | Count                                | 29                          | 115   | 87    | 0      | 231    |
|                       |                | Expected Count                       | 26.5                        | 115.1 | 88.3  | 1.1    | 231.0  |
|                       |                | % within symptoms of infection       | 12.6%                       | 49.8% | 37.7% | .0%    | 100.0% |
|                       |                | % within main source of water supply | 40.8%                       | 37.2% | 36.7% | .0%    | 37.3%  |
|                       |                | % of Total                           | 4.7%                        | 18.5% | 14.0% | .0%    | 37.3%  |
| waist pain            |                | Count                                | 9                           | 57    | 23    | 0      | 89     |
|                       |                | Expected Count                       | 10.2                        | 44.4  | 34.0  | .4     | 89.0   |
|                       |                | % within symptoms of infection       | 10.1%                       | 64.0% | 25.8% | .0%    | 100.0% |
|                       |                | % within main source of water supply | 12.7%                       | 18.4% | 9.7%  | .0%    | 14.4%  |
|                       |                | % of Total                           | 1.5%                        | 9.2%  | 3.7%  | .0%    | 14.4%  |
| blurred vision        |                | Count                                | 6                           | 9     | 12    | 0      | 27     |
|                       |                | Expected Count                       | 3.1                         | 13.5  | 10.3  | .1     | 27.0   |
|                       |                | % within symptoms of infection       | 22.2%                       | 33.3% | 44.4% | .0%    | 100.0% |
|                       |                | % within main source of water supply | 8.5%                        | 2.9%  | 5.1%  | .0%    | 4.4%   |
|                       |                | % of Total                           | 1.0%                        | 1.5%  | 1.9%  | .0%    | 4.4%   |
| i don't know          | Count          | 10                                   | 29                          | 19    | 2     | 60     |        |

|       |                                      |        |        |        |        |        |
|-------|--------------------------------------|--------|--------|--------|--------|--------|
|       | Expected Count                       | 6.9    | 29.9   | 22.9   | .3     | 60.0   |
|       | % within symptoms of infection       | 16.7%  | 48.3%  | 31.7%  | 3.3%   | 100.0% |
|       | % within main source of water supply | 14.1%  | 9.4%   | 8.0%   | 66.7%  | 9.7%   |
|       | % of Total                           | 1.6%   | 4.7%   | 3.1%   | .3%    | 9.7%   |
| Total | Count                                | 71     | 309    | 237    | 3      | 620    |
|       | Expected Count                       | 71.0   | 309.0  | 237.0  | 3.0    | 620.0  |
|       | % within symptoms of infection       | 11.5%  | 49.8%  | 38.2%  | .5%    | 100.0% |
|       | % within main source of water supply | 100.0% | 100.0% | 100.0% | 100.0% | 100.0% |
|       | % of Total                           | 11.5%  | 49.8%  | 38.2%  | .5%    | 100.0% |

#### Chi-Square Tests

|                              | Value               | df | Asymp. Sig. (2-sided) |
|------------------------------|---------------------|----|-----------------------|
| Pearson Chi-Square           | 38.827 <sup>a</sup> | 16 | .001                  |
| Likelihood Ratio             | 41.845              | 16 | .000                  |
| Linear-by-Linear Association | .052                | 1  | .819                  |
| N of Valid Cases             | 620                 |    |                       |

a. 8 cells (32.0%) have expected count less than 5. The minimum expected count is .91.

**symptoms of infection \* main source of water supply**

### Chi-Square Tests

|                              | Value               | df | Asymp. Sig. (2-sided) |
|------------------------------|---------------------|----|-----------------------|
| Pearson Chi-Square           | 31.271 <sup>a</sup> | 12 | .002                  |
| Likelihood Ratio             | 26.932              | 12 | .008                  |
| Linear-by-Linear Association | 5.286               | 1  | .021                  |
| N of Valid Cases             | 620                 |    |                       |

a. 6 cells (30.0%) have expected count less than 5. The minimum expected count is .13.

|                       |                |                                  | contact made with water |         |                   |         |            |        |
|-----------------------|----------------|----------------------------------|-------------------------|---------|-------------------|---------|------------|--------|
|                       |                |                                  | play or bath            | washing | agricultural work | fishing | no contact | Total  |
| symptoms of infection | blood in urine | Count                            | 40                      | 119     | 22                | 7       | 25         | 213    |
|                       |                | Expected Count                   | 47.1                    | 118.2   | 17.5              | 4.5     | 25.8       | 213.0  |
|                       |                | % within symptoms of infection   | 18.8%                   | 55.9%   | 10.3%             | 3.3%    | 11.7%      | 100.0% |
|                       |                | % within contact made with water | 29.2%                   | 34.6%   | 43.1%             | 53.8%   | 33.3%      | 34.4%  |
|                       |                | % of Total                       | 6.5%                    | 19.2%   | 3.5%              | 1.1%    | 4.0%       | 34.4%  |
| stomach pain          |                | Count                            | 48                      | 144     | 9                 | 5       | 25         | 231    |
|                       |                | Expected Count                   | 51.0                    | 128.2   | 19.0              | 4.8     | 27.9       | 231.0  |
|                       |                | % within symptoms of infection   | 20.8%                   | 62.3%   | 3.9%              | 2.2%    | 10.8%      | 100.0% |
|                       |                | % within contact made with water | 35.0%                   | 41.9%   | 17.6%             | 38.5%   | 33.3%      | 37.3%  |
|                       |                | % of Total                       | 7.7%                    | 23.2%   | 1.5%              | .8%     | 4.0%       | 37.3%  |
| waist pain            |                | Count                            | 20                      | 45      | 10                | 1       | 13         | 89     |
|                       |                | Expected Count                   | 19.7                    | 49.4    | 7.3               | 1.9     | 10.8       | 89.0   |
|                       |                | % within symptoms of infection   | 22.5%                   | 50.6%   | 11.2%             | 1.1%    | 14.6%      | 100.0% |
|                       |                | % within contact made with water | 14.6%                   | 13.1%   | 19.6%             | 7.7%    | 17.3%      | 14.4%  |
|                       |                | % of Total                       | 3.2%                    | 7.3%    | 1.6%              | .2%     | 2.1%       | 14.4%  |
|                       |                | Count                            | 10                      | 9       | 5                 | 0       | 3          | 27     |



|                |                                  |        |        |        |        |        |        |
|----------------|----------------------------------|--------|--------|--------|--------|--------|--------|
| blurred vision | Expected Count                   | 6.0    | 15.0   | 2.2    | .6     | 3.3    | 27.0   |
|                | % within symtoms of infection    | 37.0%  | 33.3%  | 18.5%  | .0%    | 11.1%  | 100.0% |
|                | % within contact made with water | 7.3%   | 2.6%   | 9.8%   | .0%    | 4.0%   | 4.4%   |
|                | % of Total                       | 1.6%   | 1.5%   | .8%    | .0%    | .5%    | 4.4%   |
| i don't know   | Count                            | 19     | 27     | 5      | 0      | 9      | 60     |
|                | Expected Count                   | 13.3   | 33.3   | 4.9    | 1.3    | 7.3    | 60.0   |
|                | % within symtoms of infection    | 31.7%  | 45.0%  | 8.3%   | .0%    | 15.0%  | 100.0% |
|                | % within contact made with water | 13.9%  | 7.8%   | 9.8%   | .0%    | 12.0%  | 9.7%   |
|                | % of Total                       | 3.1%   | 4.4%   | .8%    | .0%    | 1.5%   | 9.7%   |
| Total          | Count                            | 137    | 344    | 51     | 13     | 75     | 620    |
|                | Expected Count                   | 137.0  | 344.0  | 51.0   | 13.0   | 75.0   | 620.0  |
|                | % within symtoms of infection    | 22.1%  | 55.5%  | 8.2%   | 2.1%   | 12.1%  | 100.0% |
|                | % within contact made with water | 100.0% | 100.0% | 100.0% | 100.0% | 100.0% | 100.0% |
|                | % of Total                       | 22.1%  | 55.5%  | 8.2%   | 2.1%   | 12.1%  | 100.0% |

**symtoms of infection \* contact made with water**

### Chi-Square Tests

|                              | Value               | df | Asymp. Sig. (2-sided) |
|------------------------------|---------------------|----|-----------------------|
| Pearson Chi-Square           | 28.161 <sup>a</sup> | 16 | .030                  |
| Likelihood Ratio             | 29.706              | 16 | .020                  |
| Linear-by-Linear Association | .379                | 1  | .538                  |
| N of Valid Cases             | 620                 |    |                       |

a. 8 cells (32.0%) have expected count less than 5. The minimum expected count is .57.

**symtoms of infection \* mother complete primary education**

Crosstab

|                                     |                                            | mother complete primary education |       |        |
|-------------------------------------|--------------------------------------------|-----------------------------------|-------|--------|
|                                     |                                            | yes                               | no    | Total  |
| symtoms of infection blood in urine | Count                                      | 149                               | 64    | 213    |
|                                     | Expected Count                             | 148.4                             | 64.6  | 213.0  |
|                                     | % within sytoms of infection               | 70.0%                             | 30.0% | 100.0% |
|                                     | % within mother complete primary education | 34.5%                             | 34.0% | 34.4%  |
|                                     | % of Total                                 | 24.0%                             | 10.3% | 34.4%  |
| stomach pain                        | Count                                      | 155                               | 76    | 231    |
|                                     | Expected Count                             | 161.0                             | 70.0  | 231.0  |
|                                     | % within sytoms of infection               | 67.1%                             | 32.9% | 100.0% |
|                                     | % within mother complete primary education | 35.9%                             | 40.4% | 37.3%  |
|                                     | % of Total                                 | 25.0%                             | 12.3% | 37.3%  |
| waist pain                          | Count                                      | 62                                | 27    | 89     |
|                                     | Expected Count                             | 62.0                              | 27.0  | 89.0   |
|                                     | % within sytoms of infection               | 69.7%                             | 30.3% | 100.0% |
|                                     | % within mother complete primary education | 14.4%                             | 14.4% | 14.4%  |
|                                     | % of Total                                 | 10.0%                             | 4.4%  | 14.4%  |
| blurred vision                      | Count                                      | 15                                | 12    | 27     |
|                                     | Expected Count                             | 18.8                              | 8.2   | 27.0   |
|                                     | % within sytoms of infection               | 55.6%                             | 44.4% | 100.0% |

|              |                                            |        |        |        |
|--------------|--------------------------------------------|--------|--------|--------|
|              | % within mother complete primary education | 3.5%   | 6.4%   | 4.4%   |
|              | % of Total                                 | 2.4%   | 1.9%   | 4.4%   |
| i don't know | Count                                      | 51     | 9      | 60     |
|              | Expected Count                             | 41.8   | 18.2   | 60.0   |
|              | % within symptoms of infection             | 85.0%  | 15.0%  | 100.0% |
|              | % within mother complete primary education | 11.8%  | 4.8%   | 9.7%   |
|              | % of Total                                 | 8.2%   | 1.5%   | 9.7%   |
| Total        | Count                                      | 432    | 188    | 620    |
|              | Expected Count                             | 432.0  | 188.0  | 620.0  |
|              | % within symptoms of infection             | 69.7%  | 30.3%  | 100.0% |
|              | % within mother complete primary education | 100.0% | 100.0% | 100.0% |
|              | % of Total                                 | 69.7%  | 30.3%  | 100.0% |

#### Chi-Square Tests

|                              | Value              | df | Asymp. Sig. (2-sided) |
|------------------------------|--------------------|----|-----------------------|
| Pearson Chi-Square           | 9.950 <sup>a</sup> | 4  | .041                  |
| Likelihood Ratio             | 10.711             | 4  | .030                  |
| Linear-by-Linear Association | 1.902              | 1  | .168                  |
| N of Valid Cases             | 620                |    |                       |

a. 0 cells (.0%) have expected count less than 5. The minimum expected count is 8.19.

|                      |                |                                            | father complete primary education |       |        |
|----------------------|----------------|--------------------------------------------|-----------------------------------|-------|--------|
|                      |                |                                            | yes                               | no    | Total  |
| symtoms of infection | blood in urine | Count                                      | 163                               | 50    | 213    |
|                      |                | Expected Count                             | 163.9                             | 49.1  | 213.0  |
|                      |                | % within symtoms of infection              | 76.5%                             | 23.5% | 100.0% |
|                      |                | % within father complete primary education | 34.2%                             | 35.0% | 34.4%  |
|                      |                | % of Total                                 | 26.3%                             | 8.1%  | 34.4%  |
| stomach pain         |                | Count                                      | 171                               | 60    | 231    |
|                      |                | Expected Count                             | 177.7                             | 53.3  | 231.0  |
|                      |                | % within symtoms of infection              | 74.0%                             | 26.0% | 100.0% |
|                      |                | % within father complete primary education | 35.8%                             | 42.0% | 37.3%  |
|                      |                | % of Total                                 | 27.6%                             | 9.7%  | 37.3%  |
| waist pain           |                | Count                                      | 73                                | 16    | 89     |
|                      |                | Expected Count                             | 68.5                              | 20.5  | 89.0   |
|                      |                | % within symtoms of infection              | 82.0%                             | 18.0% | 100.0% |
|                      |                | % within father complete primary education | 15.3%                             | 11.2% | 14.4%  |
|                      |                | % of Total                                 | 11.8%                             | 2.6%  | 14.4%  |
| blurred vision       |                | Count                                      | 14                                | 13    | 27     |
|                      |                | Expected Count                             | 20.8                              | 6.2   | 27.0   |
|                      |                | % within symtoms of infection              | 51.9%                             | 48.1% | 100.0% |
|                      |                | % within father complete primary education | 2.9%                              | 9.1%  | 4.4%   |
|                      |                | % of Total                                 |                                   |       |        |

|              |                                            |        |        |        |
|--------------|--------------------------------------------|--------|--------|--------|
|              | % of Total                                 | 2.3%   | 2.1%   | 4.4%   |
| i don't know | Count                                      | 56     | 4      | 60     |
|              | Expected Count                             | 46.2   | 13.8   | 60.0   |
|              | % within syptoms of infection              | 93.3%  | 6.7%   | 100.0% |
|              | % within father complete primary education | 11.7%  | 2.8%   | 9.7%   |
|              | % of Total                                 | 9.0%   | .6%    | 9.7%   |
| Total        | Count                                      | 477    | 143    | 620    |
|              | Expected Count                             | 477.0  | 143.0  | 620.0  |
|              | % within syptoms of infection              | 76.9%  | 23.1%  | 100.0% |
|              | % within father complete primary education | 100.0% | 100.0% | 100.0% |
|              | % of Total                                 | 76.9%  | 23.1%  | 100.0% |

syptoms of infection \* father complete primary education

|                       |                |                                | mother's occupation |         |               |            | Total  |
|-----------------------|----------------|--------------------------------|---------------------|---------|---------------|------------|--------|
|                       |                |                                | trading             | farming | salary earner | unemployed |        |
| symptoms of infection | blood in urine | Count                          | 95                  | 58      | 34            | 26         | 213    |
|                       |                | Expected Count                 | 100.0               | 47.4    | 44.3          | 21.3       | 213.0  |
|                       |                | % within symptoms of infection | 44.6%               | 27.2%   | 16.0%         | 12.2%      | 100.0% |
|                       |                | % within mother's occupation   | 32.6%               | 42.0%   | 26.4%         | 41.9%      | 34.4%  |
|                       |                | % of Total                     | 15.3%               | 9.4%    | 5.5%          | 4.2%       | 34.4%  |
|                       | stomach pain   | Count                          | 115                 | 55      | 42            | 19         | 231    |
|                       |                | Expected Count                 | 108.4               | 51.4    | 48.1          | 23.1       | 231.0  |
|                       |                | % within symptoms of infection | 49.8%               | 23.8%   | 18.2%         | 8.2%       | 100.0% |
|                       |                | % within mother's occupation   | 39.5%               | 39.9%   | 32.6%         | 30.6%      | 37.3%  |
|                       |                | % of Total                     | 18.5%               | 8.9%    | 6.8%          | 3.1%       | 37.3%  |
|                       | waist pain     | Count                          | 36                  | 15      | 27            | 11         | 89     |
|                       |                | Expected Count                 | 41.8                | 19.8    | 18.5          | 8.9        | 89.0   |
|                       |                | % within symptoms of infection | 40.4%               | 16.9%   | 30.3%         | 12.4%      | 100.0% |
|                       |                | % within mother's occupation   | 12.4%               | 10.9%   | 20.9%         | 17.7%      | 14.4%  |
|                       |                | % of Total                     | 5.8%                | 2.4%    | 4.4%          | 1.8%       | 14.4%  |
|                       | blurred vision | Count                          | 11                  | 7       | 7             | 2          | 27     |
|                       |                | Expected Count                 | 12.7                | 6.0     | 5.6           | 2.7        | 27.0   |
|                       |                | % within symptoms of infection | 40.7%               | 25.9%   | 25.9%         | 7.4%       | 100.0% |
|                       |                | % within mother's occupation   | 3.8%                | 5.1%    | 5.4%          | 3.2%       | 4.4%   |

|       |                                |        |        |        |        |        |
|-------|--------------------------------|--------|--------|--------|--------|--------|
|       | % of Total                     | 1.8%   | 1.1%   | 1.1%   | .3%    | 4.4%   |
|       | i don't know Count             | 34     | 3      | 19     | 4      | 60     |
|       | Expected Count                 | 28.2   | 13.4   | 12.5   | 6.0    | 60.0   |
|       | % within symptoms of infection | 56.7%  | 5.0%   | 31.7%  | 6.7%   | 100.0% |
|       | % within mother's occupation   | 11.7%  | 2.2%   | 14.7%  | 6.5%   | 9.7%   |
|       | % of Total                     | 5.5%   | .5%    | 3.1%   | .6%    | 9.7%   |
| Total | Count                          | 291    | 138    | 129    | 62     | 620    |
|       | Expected Count                 | 291.0  | 138.0  | 129.0  | 62.0   | 620.0  |
|       | % within symptoms of infection | 46.9%  | 22.3%  | 20.8%  | 10.0%  | 100.0% |
|       | % within mother's occupation   | 100.0% | 100.0% | 100.0% | 100.0% | 100.0% |
|       | % of Total                     | 46.9%  | 22.3%  | 20.8%  | 10.0%  | 100.0% |

### Chi-Square Tests

|                              | Value               | df | Asymp. Sig. (2-sided) |
|------------------------------|---------------------|----|-----------------------|
| Pearson Chi-Square           | 21.085 <sup>a</sup> | 4  | .000                  |
| Likelihood Ratio             | 22.264              | 4  | .000                  |
| Linear-by-Linear Association | 2.762               | 1  | .097                  |
| N of Valid Cases             | 620                 |    |                       |

a. 0 cells (.0%) have expected count less than 5. The minimum expected count is 6.23.



|                            |                   |                                     | father's occupation |         |         |               |             |        |
|----------------------------|-------------------|-------------------------------------|---------------------|---------|---------|---------------|-------------|--------|
|                            |                   |                                     | fishing             | farming | trading | salary earner | wage earner | Total  |
| symtoms<br>of<br>infection | blood in<br>urine | Count                               | 11                  | 92      | 55      | 42            | 13          | 213    |
|                            |                   | Expected Count                      | 5.2                 | 90.4    | 55.3    | 45.3          | 16.8        | 213.0  |
|                            |                   | % within<br>symtoms of<br>infection | 5.2%                | 43.2%   | 25.8%   | 19.7%         | 6.1%        | 100.0% |
|                            |                   | % within<br>father's<br>occupation  | 73.3%               | 35.0%   | 34.2%   | 31.8%         | 26.5%       | 34.4%  |
|                            |                   | % of Total                          | 1.8%                | 14.8%   | 8.9%    | 6.8%          | 2.1%        | 34.4%  |
| stomach<br>pain            |                   | Count                               | 4                   | 104     | 62      | 44            | 17          | 231    |
|                            |                   | Expected Count                      | 5.6                 | 98.0    | 60.0    | 49.2          | 18.3        | 231.0  |
|                            |                   | % within<br>symtoms of<br>infection | 1.7%                | 45.0%   | 26.8%   | 19.0%         | 7.4%        | 100.0% |
|                            |                   | % within<br>father's<br>occupation  | 26.7%               | 39.5%   | 38.5%   | 33.3%         | 34.7%       | 37.3%  |
|                            |                   | % of Total                          | .6%                 | 16.8%   | 10.0%   | 7.1%          | 2.7%        | 37.3%  |
| waist pain                 |                   | Count                               | 0                   | 36      | 19      | 25            | 9           | 89     |
|                            |                   | Expected Count                      | 2.2                 | 37.8    | 23.1    | 18.9          | 7.0         | 89.0   |
|                            |                   | % within<br>symtoms of<br>infection | .0%                 | 40.4%   | 21.3%   | 28.1%         | 10.1%       | 100.0% |
|                            |                   | % within<br>father's<br>occupation  | .0%                 | 13.7%   | 11.8%   | 18.9%         | 18.4%       | 14.4%  |
|                            |                   | % of Total                          | .0%                 | 5.8%    | 3.1%    | 4.0%          | 1.5%        | 14.4%  |
| blurred<br>vision          |                   | Count                               | 0                   | 14      | 8       | 4             | 1           | 27     |
|                            |                   | Expected Count                      | .7                  | 11.5    | 7.0     | 5.7           | 2.1         | 27.0   |

|                 |                                      |        |        |        |        |        |        |
|-----------------|--------------------------------------|--------|--------|--------|--------|--------|--------|
|                 | % within<br>symptoms of<br>infection | .0%    | 51.9%  | 29.6%  | 14.8%  | 3.7%   | 100.0% |
|                 | % within<br>father's<br>occupation   | .0%    | 5.3%   | 5.0%   | 3.0%   | 2.0%   | 4.4%   |
|                 | % of Total                           | .0%    | 2.3%   | 1.3%   | .6%    | .2%    | 4.4%   |
| i don't<br>know | Count                                | 0      | 17     | 17     | 17     | 9      | 60     |
|                 | Expected Count                       | 1.5    | 25.5   | 15.6   | 12.8   | 4.7    | 60.0   |
|                 | % within<br>symptoms of<br>infection | .0%    | 28.3%  | 28.3%  | 28.3%  | 15.0%  | 100.0% |
|                 | % within<br>father's<br>occupation   | .0%    | 6.5%   | 10.6%  | 12.9%  | 18.4%  | 9.7%   |
|                 | % of Total                           | .0%    | 2.7%   | 2.7%   | 2.7%   | 1.5%   | 9.7%   |
| Total           | Count                                | 15     | 263    | 161    | 132    | 49     | 620    |
|                 | Expected Count                       | 15.0   | 263.0  | 161.0  | 132.0  | 49.0   | 620.0  |
|                 | % within<br>symptoms of<br>infection | 2.4%   | 42.4%  | 26.0%  | 21.3%  | 7.9%   | 100.0% |
|                 | % within<br>father's<br>occupation   | 100.0% | 100.0% | 100.0% | 100.0% | 100.0% | 100.0% |
|                 | % of Total                           | 2.4%   | 42.4%  | 26.0%  | 21.3%  | 7.9%   | 100.0% |

**symptoms of infection \* mother's occupation**

### Chi-Square Tests

|                              | Value               | df | Asymp. Sig. (2-sided) |
|------------------------------|---------------------|----|-----------------------|
| Pearson Chi-Square           | 28.753 <sup>a</sup> | 12 | .004                  |
| Likelihood Ratio             | 31.693              | 12 | .002                  |
| Linear-by-Linear Association | .060                | 1  | .807                  |
| N of Valid Cases             | 620                 |    |                       |

a. 1 cells (5.0%) have expected count less than 5. The minimum expected count is 2.70.

**symtoms of infection \* father's occupation**

### Chi-Square Tests

|                              | Value               | df | Asymp. Sig. (2-sided) |
|------------------------------|---------------------|----|-----------------------|
| Pearson Chi-Square           | 26.857 <sup>a</sup> | 16 | .043                  |
| Likelihood Ratio             | 29.043              | 16 | .024                  |
| Linear-by-Linear Association | 10.775              | 1  | .001                  |
| N of Valid Cases             | 620                 |    |                       |

a. 5 cells (20.0%) have expected count less than 5. The minimum expected count is .65.

**symtoms of infection \* sex**

Crosstab

|                      |                |                               | sex   |        |        |
|----------------------|----------------|-------------------------------|-------|--------|--------|
|                      |                |                               | male  | female | Total  |
| symtoms of infection | blood in urine | Count                         | 132   | 81     | 213    |
|                      |                | Expected Count                | 124.4 | 88.6   | 213.0  |
|                      |                | % within symtoms of infection | 62.0% | 38.0%  | 100.0% |
|                      |                | % within sex                  | 36.5% | 31.4%  | 34.4%  |
|                      |                | % of Total                    | 21.3% | 13.1%  | 34.4%  |
| stomach pain         |                | Count                         | 130   | 101    | 231    |
|                      |                | Expected Count                | 134.9 | 96.1   | 231.0  |
|                      |                | % within symtoms of infection | 56.3% | 43.7%  | 100.0% |
|                      |                | % within sex                  | 35.9% | 39.1%  | 37.3%  |
|                      |                | % of Total                    | 21.0% | 16.3%  | 37.3%  |
| waist pain           |                | Count                         | 48    | 41     | 89     |
|                      |                | Expected Count                | 52.0  | 37.0   | 89.0   |
|                      |                | % within symtoms of infection | 53.9% | 46.1%  | 100.0% |
|                      |                | % within sex                  | 13.3% | 15.9%  | 14.4%  |
|                      |                | % of Total                    | 7.7%  | 6.6%   | 14.4%  |
| blurred vision       |                | Count                         | 18    | 9      | 27     |
|                      |                | Expected Count                | 15.8  | 11.2   | 27.0   |
|                      |                | % within symtoms of infection | 66.7% | 33.3%  | 100.0% |
|                      |                | % within sex                  | 5.0%  | 3.5%   | 4.4%   |

|              |                               |        |        |        |
|--------------|-------------------------------|--------|--------|--------|
|              | % of Total                    | 2.9%   | 1.5%   | 4.4%   |
| i don't know | Count                         | 34     | 26     | 60     |
|              | Expected Count                | 35.0   | 25.0   | 60.0   |
|              | % within syptoms of infection | 56.7%  | 43.3%  | 100.0% |
|              | % within sex                  | 9.4%   | 10.1%  | 9.7%   |
|              | % of Total                    | 5.5%   | 4.2%   | 9.7%   |
| Total        | Count                         | 362    | 258    | 620    |
|              | Expected Count                | 362.0  | 258.0  | 620.0  |
|              | % within syptoms of infection | 58.4%  | 41.6%  | 100.0% |
|              | % within sex                  | 100.0% | 100.0% | 100.0% |
|              | % of Total                    | 58.4%  | 41.6%  | 100.0% |

|                       |                |                                | Age distribution |       |         |         |       | Total  |
|-----------------------|----------------|--------------------------------|------------------|-------|---------|---------|-------|--------|
|                       |                |                                | <_4              | 5 - 9 | 10 - 14 | 15 - 19 | >_20  |        |
| symptoms of infection | blood in urine | Count                          | 6                | 56    | 88      | 62      | 1     | 213    |
|                       |                | Expected Count                 | 5.8              | 53.6  | 92.8    | 57.7    | 3.1   | 213.0  |
|                       |                | % within symptoms of infection | 2.8%             | 26.3% | 41.3%   | 29.1%   | .5%   | 100.0% |
|                       |                | % within Age distribution      | 35.3%            | 35.9% | 32.6%   | 36.9%   | 11.1% | 34.4%  |
|                       |                | % of Total                     | 1.0%             | 9.0%  | 14.2%   | 10.0%   | .2%   | 34.4%  |
| stomach pain          |                | Count                          | 10               | 50    | 112     | 53      | 6     | 231    |
|                       |                | Expected Count                 | 6.3              | 58.1  | 100.6   | 62.6    | 3.4   | 231.0  |
|                       |                | % within symptoms of infection | 4.3%             | 21.6% | 48.5%   | 22.9%   | 2.6%  | 100.0% |
|                       |                | % within Age distribution      | 58.8%            | 32.1% | 41.5%   | 31.5%   | 66.7% | 37.3%  |
|                       |                | % of Total                     | 1.6%             | 8.1%  | 18.1%   | 8.5%    | 1.0%  | 37.3%  |
| waist pain            |                | Count                          | 1                | 31    | 34      | 23      | 0     | 89     |
|                       |                | Expected Count                 | 2.4              | 22.4  | 38.8    | 24.1    | 1.3   | 89.0   |
|                       |                | % within symptoms of infection | 1.1%             | 34.8% | 38.2%   | 25.8%   | .0%   | 100.0% |
|                       |                | % within Age distribution      | 5.9%             | 19.9% | 12.6%   | 13.7%   | .0%   | 14.4%  |
|                       |                | % of Total                     | .2%              | 5.0%  | 5.5%    | 3.7%    | .0%   | 14.4%  |
| blurred vision        |                | Count                          | 0                | 4     | 12      | 11      | 0     | 27     |
|                       |                | Expected Count                 | .7               | 6.8   | 11.8    | 7.3     | .4    | 27.0   |
|                       |                | % within symptoms of infection | .0%              | 14.8% | 44.4%   | 40.7%   | .0%   | 100.0% |
|                       |                | % within Age distribution      | .0%              | 2.6%  | 4.4%    | 6.5%    | .0%   | 4.4%   |
|                       |                | % of Total                     | .0%              | .6%   | 1.9%    | 1.8%    | .0%   | 4.4%   |

|              |                                |        |        |        |        |        |        |
|--------------|--------------------------------|--------|--------|--------|--------|--------|--------|
| i don't know | Count                          | 0      | 15     | 24     | 19     | 2      | 60     |
|              | Expected Count                 | 1.6    | 15.1   | 26.1   | 16.3   | .9     | 60.0   |
|              | % within symptoms of infection | .0%    | 25.0%  | 40.0%  | 31.7%  | 3.3%   | 100.0% |
|              | % within Age distribution      | .0%    | 9.6%   | 8.9%   | 11.3%  | 22.2%  | 9.7%   |
|              | % of Total                     | .0%    | 2.4%   | 3.9%   | 3.1%   | .3%    | 9.7%   |
| Total        | Count                          | 17     | 156    | 270    | 168    | 9      | 620    |
|              | Expected Count                 | 17.0   | 156.0  | 270.0  | 168.0  | 9.0    | 620.0  |
|              | % within symptoms of infection | 2.7%   | 25.2%  | 43.5%  | 27.1%  | 1.5%   | 100.0% |
|              | % within Age distribution      | 100.0% | 100.0% | 100.0% | 100.0% | 100.0% | 100.0% |
|              | % of Total                     | 2.7%   | 25.2%  | 43.5%  | 27.1%  | 1.5%   | 100.0% |

### Chi-Square Tests

|                              | Value              | df | Asymp. Sig. (2-sided) |
|------------------------------|--------------------|----|-----------------------|
| Pearson Chi-Square           | 3.112 <sup>a</sup> | 4  | .539                  |
| Likelihood Ratio             | 3.132              | 4  | .536                  |
| Linear-by-Linear Association | .462               | 1  | .497                  |
| N of Valid Cases             | 620                |    |                       |

a. 0 cells (.0%) have expected count less than 5. The minimum expected count is 11.24.

**symtoms of infection \* Age distribution**

|                   |                         |                                      | main source of water supply |       |       |        |        |
|-------------------|-------------------------|--------------------------------------|-----------------------------|-------|-------|--------|--------|
|                   |                         |                                      | tap                         | well  | river | others | Total  |
| intermediate host | housefly and cocroaches | Count                                | 23                          | 139   | 120   | 0      | 282    |
|                   |                         | Expected Count                       | 32.3                        | 140.5 | 107.8 | 1.4    | 282.0  |
|                   |                         | % within intermediate host           | 8.2%                        | 49.3% | 42.6% | .0%    | 100.0% |
|                   |                         | % within main source of water supply | 32.4%                       | 45.0% | 50.6% | .0%    | 45.5%  |
|                   |                         | % of Total                           | 3.7%                        | 22.4% | 19.4% | .0%    | 45.5%  |
|                   | water snail             | Count                                | 20                          | 51    | 27    | 1      | 99     |
|                   |                         | Expected Count                       | 11.3                        | 49.3  | 37.8  | .5     | 99.0   |
|                   |                         | % within intermediate host           | 20.2%                       | 51.5% | 27.3% | 1.0%   | 100.0% |
|                   |                         | % within main source of water supply | 28.2%                       | 16.5% | 11.4% | 33.3%  | 16.0%  |
|                   |                         | % of Total                           | 3.2%                        | 8.2%  | 4.4%  | .2%    | 16.0%  |
|                   | fish                    | Count                                | 14                          | 60    | 61    | 0      | 135    |
|                   |                         | Expected Count                       | 15.5                        | 67.3  | 51.6  | .7     | 135.0  |
|                   |                         | % within intermediate host           | 10.4%                       | 44.4% | 45.2% | .0%    | 100.0% |
|                   |                         | % within main source of water supply | 19.7%                       | 19.4% | 25.7% | .0%    | 21.8%  |
|                   |                         | % of Total                           | 2.3%                        | 9.7%  | 9.8%  | .0%    | 21.8%  |
|                   | houserat                | Count                                | 7                           | 31    | 12    | 1      | 51     |
|                   |                         | Expected Count                       | 5.8                         | 25.4  | 19.5  | .2     | 51.0   |
|                   |                         | % within intermediate host           | 13.7%                       | 60.8% | 23.5% | 2.0%   | 100.0% |
|                   |                         | % within main source of water supply | 9.9%                        | 10.0% | 5.1%  | 33.3%  | 8.2%   |
|                   |                         | % of Total                           | 1.1%                        | 5.0%  | 1.9%  | .2%    | 8.2%   |



|              |                                      |        |        |        |        |        |
|--------------|--------------------------------------|--------|--------|--------|--------|--------|
| i don't know | Count                                | 7      | 28     | 17     | 1      | 53     |
|              | Expected Count                       | 6.1    | 26.4   | 20.3   | .3     | 53.0   |
|              | % within intermediate host           | 13.2%  | 52.8%  | 32.1%  | 1.9%   | 100.0% |
|              | % within main source of water supply | 9.9%   | 9.1%   | 7.2%   | 33.3%  | 8.5%   |
|              | % of Total                           | 1.1%   | 4.5%   | 2.7%   | .2%    | 8.5%   |
| Total        | Count                                | 71     | 309    | 237    | 3      | 620    |
|              | Expected Count                       | 71.0   | 309.0  | 237.0  | 3.0    | 620.0  |
|              | % within intermediate host           | 11.5%  | 49.8%  | 38.2%  | .5%    | 100.0% |
|              | % within main source of water supply | 100.0% | 100.0% | 100.0% | 100.0% | 100.0% |
|              | % of Total                           | 11.5%  | 49.8%  | 38.2%  | .5%    | 100.0% |

### Chi-Square Tests

|                              | Value               | df | Asymp. Sig. (2-sided) |
|------------------------------|---------------------|----|-----------------------|
| Pearson Chi-Square           | 24.171 <sup>a</sup> | 16 | .086                  |
| Likelihood Ratio             | 27.567              | 16 | .036                  |
| Linear-by-Linear Association | 1.663               | 1  | .197                  |
| N of Valid Cases             | 620                 |    |                       |

a. 8 cells (32.0%) have expected count less than 5. The minimum expected count is .39.

**intermediate host \* main source of water supply**

### Chi-Square Tests

|                              | Value               | df | Asymp. Sig. (2-sided) |
|------------------------------|---------------------|----|-----------------------|
| Pearson Chi-Square           | 28.631 <sup>a</sup> | 12 | .004                  |
| Likelihood Ratio             | 28.274              | 12 | .005                  |
| Linear-by-Linear Association | 2.111               | 1  | .146                  |
| N of Valid Cases             | 620                 |    |                       |

a. 5 cells (25.0%) have expected count less than 5. The minimum expected count is .25.

|                      |                               |                                        | contact made with water |         |                      |         |            |        |
|----------------------|-------------------------------|----------------------------------------|-------------------------|---------|----------------------|---------|------------|--------|
|                      |                               |                                        | play or<br>bath         | washing | agricultural<br>work | fishing | no contact | Total  |
| intermediate<br>host | housefly<br>and<br>cocroaches | Count                                  | 55                      | 172     | 20                   | 6       | 29         | 282    |
|                      |                               | Expected<br>Count                      | 62.3                    | 156.5   | 23.2                 | 5.9     | 34.1       | 282.0  |
|                      |                               | % within<br>intermediate<br>host       | 19.5%                   | 61.0%   | 7.1%                 | 2.1%    | 10.3%      | 100.0% |
|                      |                               | % within<br>contact made<br>with water | 40.1%                   | 50.0%   | 39.2%                | 46.2%   | 38.7%      | 45.5%  |
|                      |                               | % of Total                             | 8.9%                    | 27.7%   | 3.2%                 | 1.0%    | 4.7%       | 45.5%  |
| water snail          | Count                         | Count                                  | 23                      | 57      | 6                    | 1       | 12         | 99     |
|                      |                               | Expected<br>Count                      | 21.9                    | 54.9    | 8.1                  | 2.1     | 12.0       | 99.0   |
|                      |                               | % within<br>intermediate<br>host       | 23.2%                   | 57.6%   | 6.1%                 | 1.0%    | 12.1%      | 100.0% |
|                      |                               | % within<br>contact made<br>with water | 16.8%                   | 16.6%   | 11.8%                | 7.7%    | 16.0%      | 16.0%  |
|                      |                               | % of Total                             | 3.7%                    | 9.2%    | 1.0%                 | .2%     | 1.9%       | 16.0%  |
| fish                 | Count                         | Count                                  | 24                      | 74      | 16                   | 4       | 17         | 135    |
|                      |                               | Expected<br>Count                      | 29.8                    | 74.9    | 11.1                 | 2.8     | 16.3       | 135.0  |
|                      |                               | % within<br>intermediate<br>host       | 17.8%                   | 54.8%   | 11.9%                | 3.0%    | 12.6%      | 100.0% |
|                      |                               | % within<br>contact made<br>with water | 17.5%                   | 21.5%   | 31.4%                | 30.8%   | 22.7%      | 21.8%  |
|                      |                               | % of Total                             | 3.9%                    | 11.9%   | 2.6%                 | .6%     | 2.7%       | 21.8%  |

|              |                                  |        |        |        |        |        |        |
|--------------|----------------------------------|--------|--------|--------|--------|--------|--------|
| houserat     | Count                            | 17     | 20     | 2      | 1      | 11     | 51     |
|              | Expected Count                   | 11.3   | 28.3   | 4.2    | 1.1    | 6.2    | 51.0   |
|              | % within intermediate host       | 33.3%  | 39.2%  | 3.9%   | 2.0%   | 21.6%  | 100.0% |
|              | % within contact made with water | 12.4%  | 5.8%   | 3.9%   | 7.7%   | 14.7%  | 8.2%   |
|              | % of Total                       | 2.7%   | 3.2%   | .3%    | .2%    | 1.8%   | 8.2%   |
| i don't know | Count                            | 18     | 21     | 7      | 1      | 6      | 53     |
|              | Expected Count                   | 11.7   | 29.4   | 4.4    | 1.1    | 6.4    | 53.0   |
|              | % within intermediate host       | 34.0%  | 39.6%  | 13.2%  | 1.9%   | 11.3%  | 100.0% |
|              | % within contact made with water | 13.1%  | 6.1%   | 13.7%  | 7.7%   | 8.0%   | 8.5%   |
|              | % of Total                       | 2.9%   | 3.4%   | 1.1%   | .2%    | 1.0%   | 8.5%   |
| Total        | Count                            | 137    | 344    | 51     | 13     | 75     | 620    |
|              | Expected Count                   | 137.0  | 344.0  | 51.0   | 13.0   | 75.0   | 620.0  |
|              | % within intermediate host       | 22.1%  | 55.5%  | 8.2%   | 2.1%   | 12.1%  | 100.0% |
|              | % within contact made with water | 100.0% | 100.0% | 100.0% | 100.0% | 100.0% | 100.0% |
|              | % of Total                       | 22.1%  | 55.5%  | 8.2%   | 2.1%   | 12.1%  | 100.0% |

**intermediate host \* contact made with water**

|                   |                         |                                            | mother complete primary education |       |        |
|-------------------|-------------------------|--------------------------------------------|-----------------------------------|-------|--------|
|                   |                         |                                            | yes                               | no    | Total  |
| intermediate host | housefly and cocroaches | Count                                      | 189                               | 93    | 282    |
|                   |                         | Expected Count                             | 196.5                             | 85.5  | 282.0  |
|                   |                         | % within intermediate host                 | 67.0%                             | 33.0% | 100.0% |
|                   |                         | % within mother complete primary education | 43.8%                             | 49.5% | 45.5%  |
|                   |                         | % of Total                                 | 30.5%                             | 15.0% | 45.5%  |
| water snail       |                         | Count                                      | 89                                | 10    | 99     |
|                   |                         | Expected Count                             | 69.0                              | 30.0  | 99.0   |
|                   |                         | % within intermediate host                 | 89.9%                             | 10.1% | 100.0% |
|                   |                         | % within mother complete primary education | 20.6%                             | 5.3%  | 16.0%  |
|                   |                         | % of Total                                 | 14.4%                             | 1.6%  | 16.0%  |
| fish              |                         | Count                                      | 72                                | 63    | 135    |
|                   |                         | Expected Count                             | 94.1                              | 40.9  | 135.0  |
|                   |                         | % within intermediate host                 | 53.3%                             | 46.7% | 100.0% |
|                   |                         | % within mother complete primary education | 16.7%                             | 33.5% | 21.8%  |
|                   |                         | % of Total                                 | 11.6%                             | 10.2% | 21.8%  |
| houserat          |                         | Count                                      | 39                                | 12    | 51     |
|                   |                         | Expected Count                             | 35.5                              | 15.5  | 51.0   |
|                   |                         | % within intermediate host                 | 76.5%                             | 23.5% | 100.0% |
|                   |                         | % within mother complete primary education | 9.0%                              | 6.4%  | 8.2%   |
|                   |                         | % of Total                                 | 6.3%                              | 1.9%  | 8.2%   |
| i don't know      |                         | Count                                      | 43                                | 10    | 53     |
|                   |                         | Expected Count                             | 36.9                              | 16.1  | 53.0   |

|       |                                            |        |        |        |
|-------|--------------------------------------------|--------|--------|--------|
|       | % within intermediate host                 | 81.1%  | 18.9%  | 100.0% |
|       | % within mother complete primary education | 10.0%  | 5.3%   | 8.5%   |
|       | % of Total                                 | 6.9%   | 1.6%   | 8.5%   |
| Total | Count                                      | 432    | 188    | 620    |
|       | Expected Count                             | 432.0  | 188.0  | 620.0  |
|       | % within intermediate host                 | 69.7%  | 30.3%  | 100.0% |
|       | % within mother complete primary education | 100.0% | 100.0% | 100.0% |
|       | % of Total                                 | 69.7%  | 30.3%  | 100.0% |

#### Chi-Square Tests

|                              | Value               | df | Asymp. Sig. (2-sided) |
|------------------------------|---------------------|----|-----------------------|
| Pearson Chi-Square           | 26.384 <sup>a</sup> | 16 | .049                  |
| Likelihood Ratio             | 25.368              | 16 | .064                  |
| Linear-by-Linear Association | .369                | 1  | .543                  |
| N of Valid Cases             | 620                 |    |                       |

a. 6 cells (24.0%) have expected count less than 5. The minimum expected count is 1.07.

**intermediate host \* mother complete primary education**

### Chi-Square Tests

|                              | Value               | df | Asymp. Sig. (2-sided) |
|------------------------------|---------------------|----|-----------------------|
| Pearson Chi-Square           | 41.576 <sup>a</sup> | 4  | .000                  |
| Likelihood Ratio             | 44.898              | 4  | .000                  |
| Linear-by-Linear Association | .490                | 1  | .484                  |
| N of Valid Cases             | 620                 |    |                       |

a. 0 cells (.0%) have expected count less than 5. The minimum expected count is 15.46.

**intermediate host \* father complete primary education**

Crosstab

|                   |                         |                                            | father complete primary education |       | Total  |
|-------------------|-------------------------|--------------------------------------------|-----------------------------------|-------|--------|
|                   |                         |                                            | yes                               | no    |        |
| intermediate host | housefly and cocroaches | Count                                      | 214                               | 68    | 282    |
|                   |                         | Expected Count                             | 217.0                             | 65.0  | 282.0  |
|                   |                         | % within intermediate host                 | 75.9%                             | 24.1% | 100.0% |
|                   |                         | % within father complete primary education | 44.9%                             | 47.6% | 45.5%  |
|                   |                         | % of Total                                 | 34.5%                             | 11.0% | 45.5%  |
| water snail       |                         | Count                                      | 92                                | 7     | 99     |
|                   |                         | Expected Count                             | 76.2                              | 22.8  | 99.0   |
|                   |                         | % within intermediate host                 | 92.9%                             | 7.1%  | 100.0% |
|                   |                         | % within father complete primary education | 19.3%                             | 4.9%  | 16.0%  |
|                   |                         | % of Total                                 | 14.8%                             | 1.1%  | 16.0%  |
| fish              |                         | Count                                      | 82                                | 53    | 135    |
|                   |                         | Expected Count                             | 103.9                             | 31.1  | 135.0  |
|                   |                         | % within intermediate host                 | 60.7%                             | 39.3% | 100.0% |
|                   |                         | % within father complete primary education | 17.2%                             | 37.1% | 21.8%  |
|                   |                         | % of Total                                 | 13.2%                             | 8.5%  | 21.8%  |
| houserat          |                         | Count                                      | 43                                | 8     | 51     |
|                   |                         | Expected Count                             | 39.2                              | 11.8  | 51.0   |
|                   |                         | % within intermediate host                 | 84.3%                             | 15.7% | 100.0% |
|                   |                         | % within father complete primary education | 9.0%                              | 5.6%  | 8.2%   |



|              |                                            |        |        |        |
|--------------|--------------------------------------------|--------|--------|--------|
|              | % of Total                                 | 6.9%   | 1.3%   | 8.2%   |
| i don't know | Count                                      | 46     | 7      | 53     |
|              | Expected Count                             | 40.8   | 12.2   | 53.0   |
|              | % within intermediate host                 | 86.8%  | 13.2%  | 100.0% |
|              | % within father complete primary education | 9.6%   | 4.9%   | 8.5%   |
|              | % of Total                                 | 7.4%   | 1.1%   | 8.5%   |
| Total        | Count                                      | 477    | 143    | 620    |
|              | Expected Count                             | 477.0  | 143.0  | 620.0  |
|              | % within intermediate host                 | 76.9%  | 23.1%  | 100.0% |
|              | % within father complete primary education | 100.0% | 100.0% | 100.0% |
|              | % of Total                                 | 76.9%  | 23.1%  | 100.0% |

#### Chi-Square Tests

|                              | Value               | df | Asymp. Sig. (2-sided) |
|------------------------------|---------------------|----|-----------------------|
| Pearson Chi-Square           | 38.866 <sup>a</sup> | 4  | .000                  |
| Likelihood Ratio             | 40.985              | 4  | .000                  |
| Linear-by-Linear Association | .096                | 1  | .756                  |
| N of Valid Cases             | 620                 |    |                       |

a. 0 cells (.0%) have expected count less than 5. The minimum expected count is 11.76.

|                   |                         |                              | mother's occupation |         |               |            | Total  |
|-------------------|-------------------------|------------------------------|---------------------|---------|---------------|------------|--------|
|                   |                         |                              | trading             | farming | salary earner | unemployed |        |
| intermediate host | housefly and cocroaches | Count                        | 120                 | 73      | 55            | 34         | 282    |
|                   |                         | Expected Count               | 132.4               | 62.8    | 58.7          | 28.2       | 282.0  |
|                   |                         | % within intermediate host   | 42.6%               | 25.9%   | 19.5%         | 12.1%      | 100.0% |
|                   |                         | % within mother's occupation | 41.2%               | 52.9%   | 42.6%         | 54.8%      | 45.5%  |
|                   |                         | % of Total                   | 19.4%               | 11.8%   | 8.9%          | 5.5%       | 45.5%  |
|                   | water snail             | Count                        | 67                  | 7       | 18            | 7          | 99     |
|                   |                         | Expected Count               | 46.5                | 22.0    | 20.6          | 9.9        | 99.0   |
|                   |                         | % within intermediate host   | 67.7%               | 7.1%    | 18.2%         | 7.1%       | 100.0% |
|                   |                         | % within mother's occupation | 23.0%               | 5.1%    | 14.0%         | 11.3%      | 16.0%  |
|                   |                         | % of Total                   | 10.8%               | 1.1%    | 2.9%          | 1.1%       | 16.0%  |
|                   | fish                    | Count                        | 57                  | 47      | 19            | 12         | 135    |
|                   |                         | Expected Count               | 63.4                | 30.0    | 28.1          | 13.5       | 135.0  |
|                   |                         | % within intermediate host   | 42.2%               | 34.8%   | 14.1%         | 8.9%       | 100.0% |
|                   |                         | % within mother's occupation | 19.6%               | 34.1%   | 14.7%         | 19.4%      | 21.8%  |
|                   |                         | % of Total                   | 9.2%                | 7.6%    | 3.1%          | 1.9%       | 21.8%  |
|                   | houserat                | Count                        | 22                  | 5       | 20            | 4          | 51     |
|                   |                         | Expected Count               | 23.9                | 11.4    | 10.6          | 5.1        | 51.0   |
|                   |                         | % within intermediate host   | 43.1%               | 9.8%    | 39.2%         | 7.8%       | 100.0% |
|                   |                         | % within mother's occupation | 7.6%                | 3.6%    | 15.5%         | 6.5%       | 8.2%   |
|                   |                         | % of Total                   | 3.5%                | .8%     | 3.2%          | .6%        | 8.2%   |

|              |                              |        |        |        |        |        |
|--------------|------------------------------|--------|--------|--------|--------|--------|
| i don't know | Count                        | 25     | 6      | 17     | 5      | 53     |
|              | Expected Count               | 24.9   | 11.8   | 11.0   | 5.3    | 53.0   |
|              | % within intermediate host   | 47.2%  | 11.3%  | 32.1%  | 9.4%   | 100.0% |
|              | % within mother's occupation | 8.6%   | 4.3%   | 13.2%  | 8.1%   | 8.5%   |
|              | % of Total                   | 4.0%   | 1.0%   | 2.7%   | .8%    | 8.5%   |
| Total        | Count                        | 291    | 138    | 129    | 62     | 620    |
|              | Expected Count               | 291.0  | 138.0  | 129.0  | 62.0   | 620.0  |
|              | % within intermediate host   | 46.9%  | 22.3%  | 20.8%  | 10.0%  | 100.0% |
|              | % within mother's occupation | 100.0% | 100.0% | 100.0% | 100.0% | 100.0% |
|              | % of Total                   | 46.9%  | 22.3%  | 20.8%  | 10.0%  | 100.0% |

**intermediate host \* mother's occupation**

|                   |                         |                              | father's occupation |         |         |               |             | Total  |
|-------------------|-------------------------|------------------------------|---------------------|---------|---------|---------------|-------------|--------|
|                   |                         |                              | fishing             | farming | trading | salary earner | wage earner |        |
| intermediate host | housefly and cocroaches | Count                        | 11                  | 127     | 75      | 49            | 20          | 282    |
|                   |                         | Expected Count               | 6.8                 | 119.6   | 73.2    | 60.0          | 22.3        | 282.0  |
|                   |                         | % within intermediate host   | 3.9%                | 45.0%   | 26.6%   | 17.4%         | 7.1%        | 100.0% |
|                   |                         | % within father's occupation | 73.3%               | 48.3%   | 46.6%   | 37.1%         | 40.8%       | 45.5%  |
|                   |                         | % of Total                   | 1.8%                | 20.5%   | 12.1%   | 7.9%          | 3.2%        | 45.5%  |
| water snail       |                         | Count                        | 1                   | 38      | 30      | 21            | 9           | 99     |
|                   |                         | Expected Count               | 2.4                 | 42.0    | 25.7    | 21.1          | 7.8         | 99.0   |
|                   |                         | % within intermediate host   | 1.0%                | 38.4%   | 30.3%   | 21.2%         | 9.1%        | 100.0% |
|                   |                         | % within father's occupation | 6.7%                | 14.4%   | 18.6%   | 15.9%         | 18.4%       | 16.0%  |
|                   |                         | % of Total                   | .2%                 | 6.1%    | 4.8%    | 3.4%          | 1.5%        | 16.0%  |
| fish              |                         | Count                        | 3                   | 69      | 28      | 25            | 10          | 135    |
|                   |                         | Expected Count               | 3.3                 | 57.3    | 35.1    | 28.7          | 10.7        | 135.0  |
|                   |                         | % within intermediate host   | 2.2%                | 51.1%   | 20.7%   | 18.5%         | 7.4%        | 100.0% |
|                   |                         | % within father's occupation | 20.0%               | 26.2%   | 17.4%   | 18.9%         | 20.4%       | 21.8%  |
|                   |                         | % of Total                   | .5%                 | 11.1%   | 4.5%    | 4.0%          | 1.6%        | 21.8%  |
| houserat          |                         | Count                        | 0                   | 11      | 18      | 20            | 2           | 51     |
|                   |                         | Expected Count               | 1.2                 | 21.6    | 13.2    | 10.9          | 4.0         | 51.0   |
|                   |                         | % within intermediate host   | .0%                 | 21.6%   | 35.3%   | 39.2%         | 3.9%        | 100.0% |
|                   |                         | % within father's occupation | .0%                 | 4.2%    | 11.2%   | 15.2%         | 4.1%        | 8.2%   |

|              |                              |        |        |        |        |        |        |
|--------------|------------------------------|--------|--------|--------|--------|--------|--------|
|              | % of Total                   | .0%    | 1.8%   | 2.9%   | 3.2%   | .3%    | 8.2%   |
| i don't know | Count                        | 0      | 18     | 10     | 17     | 8      | 53     |
|              | Expected Count               | 1.3    | 22.5   | 13.8   | 11.3   | 4.2    | 53.0   |
|              | % within intermediate host   | .0%    | 34.0%  | 18.9%  | 32.1%  | 15.1%  | 100.0% |
|              | % within father's occupation | .0%    | 6.8%   | 6.2%   | 12.9%  | 16.3%  | 8.5%   |
|              | % of Total                   | .0%    | 2.9%   | 1.6%   | 2.7%   | 1.3%   | 8.5%   |
| Total        | Count                        | 15     | 263    | 161    | 132    | 49     | 620    |
|              | Expected Count               | 15.0   | 263.0  | 161.0  | 132.0  | 49.0   | 620.0  |
|              | % within intermediate host   | 2.4%   | 42.4%  | 26.0%  | 21.3%  | 7.9%   | 100.0% |
|              | % within father's occupation | 100.0% | 100.0% | 100.0% | 100.0% | 100.0% | 100.0% |
|              | % of Total                   | 2.4%   | 42.4%  | 26.0%  | 21.3%  | 7.9%   | 100.0% |

#### Chi-Square Tests

|                              | Value               | df | Asymp. Sig. (2-sided) |
|------------------------------|---------------------|----|-----------------------|
| Pearson Chi-Square           | 56.421 <sup>a</sup> | 12 | .000                  |
| Likelihood Ratio             | 57.478              | 12 | .000                  |
| Linear-by-Linear Association | .055                | 1  | .814                  |
| N of Valid Cases             | 620                 |    |                       |

a. 0 cells (.0%) have expected count less than 5. The minimum expected count is 5.10.

**intermediate host \* father's occupation**

### Chi-Square Tests

|                              | Value               | df | Asymp. Sig. (2-sided) |
|------------------------------|---------------------|----|-----------------------|
| Pearson Chi-Square           | 38.239 <sup>a</sup> | 16 | .001                  |
| Likelihood Ratio             | 39.385              | 16 | .001                  |
| Linear-by-Linear Association | 11.301              | 1  | .001                  |
| N of Valid Cases             | 620                 |    |                       |

a. 6 cells (24.0%) have expected count less than 5. The minimum expected count is 1.23.

**intermediate host \* sex**

Crosstab

|                   |                         |                            | sex   |        |        |
|-------------------|-------------------------|----------------------------|-------|--------|--------|
|                   |                         |                            | male  | female | Total  |
| intermediate host | housefly and cocroaches | Count                      | 177   | 105    | 282    |
|                   |                         | Expected Count             | 164.7 | 117.3  | 282.0  |
|                   |                         | % within intermediate host | 62.8% | 37.2%  | 100.0% |
|                   |                         | % within sex               | 48.9% | 40.7%  | 45.5%  |
|                   |                         | % of Total                 | 28.5% | 16.9%  | 45.5%  |
| water snail       |                         | Count                      | 55    | 44     | 99     |
|                   |                         | Expected Count             | 57.8  | 41.2   | 99.0   |
|                   |                         | % within intermediate host | 55.6% | 44.4%  | 100.0% |
|                   |                         | % within sex               | 15.2% | 17.1%  | 16.0%  |
|                   |                         | % of Total                 | 8.9%  | 7.1%   | 16.0%  |
| fish              |                         | Count                      | 74    | 61     | 135    |
|                   |                         | Expected Count             | 78.8  | 56.2   | 135.0  |
|                   |                         | % within intermediate host | 54.8% | 45.2%  | 100.0% |
|                   |                         | % within sex               | 20.4% | 23.6%  | 21.8%  |
|                   |                         | % of Total                 | 11.9% | 9.8%   | 21.8%  |
| houserat          |                         | Count                      | 27    | 24     | 51     |
|                   |                         | Expected Count             | 29.8  | 21.2   | 51.0   |
|                   |                         | % within intermediate host | 52.9% | 47.1%  | 100.0% |
|                   |                         | % within sex               | 7.5%  | 9.3%   | 8.2%   |
|                   |                         | % of Total                 | 4.4%  | 3.9%   | 8.2%   |
| i don't know      |                         | Count                      | 29    | 24     | 53     |

|       |                            |        |        |        |
|-------|----------------------------|--------|--------|--------|
|       | Expected Count             | 30.9   | 22.1   | 53.0   |
|       | % within intermediate host | 54.7%  | 45.3%  | 100.0% |
|       | % within sex               | 8.0%   | 9.3%   | 8.5%   |
|       | % of Total                 | 4.7%   | 3.9%   | 8.5%   |
| Total | Count                      | 362    | 258    | 620    |
|       | Expected Count             | 362.0  | 258.0  | 620.0  |
|       | % within intermediate host | 58.4%  | 41.6%  | 100.0% |
|       | % within sex               | 100.0% | 100.0% | 100.0% |
|       | % of Total                 | 58.4%  | 41.6%  | 100.0% |

#### Chi-Square Tests

|                              | Value              | df | Asymp. Sig. (2-sided) |
|------------------------------|--------------------|----|-----------------------|
| Pearson Chi-Square           | 4.178 <sup>a</sup> | 4  | .383                  |
| Likelihood Ratio             | 4.188              | 4  | .381                  |
| Linear-by-Linear Association | 3.112              | 1  | .078                  |
| N of Valid Cases             | 620                |    |                       |

a. 0 cells (.0%) have expected count less than 5. The minimum expected count is 21.22.



|                   |                         |                            | Age distribution |       |         |         |       | Total  |
|-------------------|-------------------------|----------------------------|------------------|-------|---------|---------|-------|--------|
|                   |                         |                            | <_4              | 5 - 9 | 10 - 14 | 15 - 19 | >_20  |        |
| intermediate host | housefly and cocroaches | Count                      | 7                | 75    | 117     | 76      | 7     | 282    |
|                   |                         | Expected Count             | 7.7              | 71.0  | 122.8   | 76.4    | 4.1   | 282.0  |
|                   |                         | % within intermediate host | 2.5%             | 26.6% | 41.5%   | 27.0%   | 2.5%  | 100.0% |
|                   |                         | % within Age distribution  | 41.2%            | 48.1% | 43.3%   | 45.2%   | 77.8% | 45.5%  |
|                   |                         | % of Total                 | 1.1%             | 12.1% | 18.9%   | 12.3%   | 1.1%  | 45.5%  |
| water snail       |                         | Count                      | 7                | 9     | 47      | 36      | 0     | 99     |
|                   |                         | Expected Count             | 2.7              | 24.9  | 43.1    | 26.8    | 1.4   | 99.0   |
|                   |                         | % within intermediate host | 7.1%             | 9.1%  | 47.5%   | 36.4%   | .0%   | 100.0% |
|                   |                         | % within Age distribution  | 41.2%            | 5.8%  | 17.4%   | 21.4%   | .0%   | 16.0%  |
|                   |                         | % of Total                 | 1.1%             | 1.5%  | 7.6%    | 5.8%    | .0%   | 16.0%  |
| fish              |                         | Count                      | 1                | 34    | 68      | 31      | 1     | 135    |
|                   |                         | Expected Count             | 3.7              | 34.0  | 58.8    | 36.6    | 2.0   | 135.0  |
|                   |                         | % within intermediate host | .7%              | 25.2% | 50.4%   | 23.0%   | .7%   | 100.0% |
|                   |                         | % within Age distribution  | 5.9%             | 21.8% | 25.2%   | 18.5%   | 11.1% | 21.8%  |
|                   |                         | % of Total                 | .2%              | 5.5%  | 11.0%   | 5.0%    | .2%   | 21.8%  |
| houserat          |                         | Count                      | 1                | 17    | 21      | 11      | 1     | 51     |
|                   |                         | Expected Count             | 1.4              | 12.8  | 22.2    | 13.8    | .7    | 51.0   |

|              |                            |        |        |        |        |        |        |
|--------------|----------------------------|--------|--------|--------|--------|--------|--------|
|              | % within intermediate host | 2.0%   | 33.3%  | 41.2%  | 21.6%  | 2.0%   | 100.0% |
|              | % within Age distribution  | 5.9%   | 10.9%  | 7.8%   | 6.5%   | 11.1%  | 8.2%   |
|              | % of Total                 | .2%    | 2.7%   | 3.4%   | 1.8%   | .2%    | 8.2%   |
| i don't know | Count                      | 1      | 21     | 17     | 14     | 0      | 53     |
|              | Expected Count             | 1.5    | 13.3   | 23.1   | 14.4   | .8     | 53.0   |
|              | % within intermediate host | 1.9%   | 39.6%  | 32.1%  | 26.4%  | .0%    | 100.0% |
|              | % within Age distribution  | 5.9%   | 13.5%  | 6.3%   | 8.3%   | .0%    | 8.5%   |
|              | % of Total                 | .2%    | 3.4%   | 2.7%   | 2.3%   | .0%    | 8.5%   |
| Total        | Count                      | 17     | 156    | 270    | 168    | 9      | 620    |
|              | Expected Count             | 17.0   | 156.0  | 270.0  | 168.0  | 9.0    | 620.0  |
|              | % within intermediate host | 2.7%   | 25.2%  | 43.5%  | 27.1%  | 1.5%   | 100.0% |
|              | % within Age distribution  | 100.0% | 100.0% | 100.0% | 100.0% | 100.0% | 100.0% |
|              | % of Total                 | 2.7%   | 25.2%  | 43.5%  | 27.1%  | 1.5%   | 100.0% |

intermediate host \* Age distribution

### Chi-Square Tests

|                              | Value               | df | Asymp. Sig. (2-sided) |
|------------------------------|---------------------|----|-----------------------|
| Pearson Chi-Square           | 38.354 <sup>a</sup> | 16 | .001                  |
| Likelihood Ratio             | 41.475              | 16 | .000                  |
| Linear-by-Linear Association | 2.399               | 1  | .121                  |
| N of Valid Cases             | 620                 |    |                       |

a. 9 cells (36.0%) have expected count less than 5. The minimum expected count is .74.

|                               |                                      |                                      | main source of water supply |       |       |        |        |
|-------------------------------|--------------------------------------|--------------------------------------|-----------------------------|-------|-------|--------|--------|
|                               |                                      |                                      | tap                         | well  | river | others | Total  |
| source of infection           | water                                | Count                                | 18                          | 64    | 37    | 1      | 120    |
|                               |                                      | Expected Count                       | 13.7                        | 59.8  | 45.9  | .6     | 120.0  |
|                               |                                      | % within source of infection         | 15.0%                       | 53.3% | 30.8% | .8%    | 100.0% |
|                               |                                      | % within main source of water supply | 25.4%                       | 20.7% | 15.6% | 33.3%  | 19.4%  |
|                               |                                      | % of Total                           | 2.9%                        | 10.3% | 6.0%  | .2%    | 19.4%  |
| playing with infected friends | Count                                | 8                                    | 30                          | 24    | 0     | 62     |        |
|                               | Expected Count                       | 7.1                                  | 30.9                        | 23.7  | .3    | 62.0   |        |
|                               | % within source of infection         | 12.9%                                | 48.4%                       | 38.7% | .0%   | 100.0% |        |
|                               | % within main source of water supply | 11.3%                                | 9.7%                        | 10.1% | .0%   | 10.0%  |        |
|                               | % of Total                           | 1.3%                                 | 4.8%                        | 3.9%  | .0%   | 10.0%  |        |
| food                          | Count                                | 10                                   | 26                          | 16    | 1     | 53     |        |
|                               | Expected Count                       | 6.1                                  | 26.4                        | 20.3  | .3    | 53.0   |        |
|                               | % within source of infection         | 18.9%                                | 49.1%                       | 30.2% | 1.9%  | 100.0% |        |
|                               | % within main source of              | 14.1%                                | 8.4%                        | 6.8%  | 33.3% | 8.5%   |        |
|                               |                                      |                                      |                             |       |       |        |        |

|              |                                      |        |        |        |        |        |
|--------------|--------------------------------------|--------|--------|--------|--------|--------|
|              | water supply                         |        |        |        |        |        |
|              | % of Total                           | 1.6%   | 4.2%   | 2.6%   | .2%    | 8.5%   |
| i don't know | Count                                | 35     | 189    | 160    | 1      | 385    |
|              | Expected Count                       | 44.1   | 191.9  | 147.2  | 1.9    | 385.0  |
|              | % within source of infection         | 9.1%   | 49.1%  | 41.6%  | .3%    | 100.0% |
|              | % within main source of water supply | 49.3%  | 61.2%  | 67.5%  | 33.3%  | 62.1%  |
|              | % of Total                           | 5.6%   | 30.5%  | 25.8%  | .2%    | 62.1%  |
| Total        | Count                                | 71     | 309    | 237    | 3      | 620    |
|              | Expected Count                       | 71.0   | 309.0  | 237.0  | 3.0    | 620.0  |
|              | % within source of infection         | 11.5%  | 49.8%  | 38.2%  | .5%    | 100.0% |
|              | % within main source of water supply | 100.0% | 100.0% | 100.0% | 100.0% | 100.0% |
|              | % of Total                           | 11.5%  | 49.8%  | 38.2%  | .5%    | 100.0% |

source of infection \* main source of water supply

|                                        |       |                                        | contact made with water |         |                      |         |               |        |
|----------------------------------------|-------|----------------------------------------|-------------------------|---------|----------------------|---------|---------------|--------|
|                                        |       |                                        | play or<br>bath         | washing | agricultural<br>work | fishing | no<br>contact | Total  |
| source of<br>infection                 | water | Count                                  | 29                      | 64      | 7                    | 2       | 18            | 120    |
|                                        |       | Expected<br>Count                      | 26.5                    | 66.6    | 9.9                  | 2.5     | 14.5          | 120.0  |
|                                        |       | % within<br>source of<br>infection     | 24.2%                   | 53.3%   | 5.8%                 | 1.7%    | 15.0%         | 100.0% |
|                                        |       | % within<br>contact made<br>with water | 21.2%                   | 18.6%   | 13.7%                | 15.4%   | 24.0%         | 19.4%  |
|                                        |       | % of Total                             | 4.7%                    | 10.3%   | 1.1%                 | .3%     | 2.9%          | 19.4%  |
| playing<br>with<br>infected<br>friends |       | Count                                  | 13                      | 38      | 2                    | 5       | 4             | 62     |
|                                        |       | Expected<br>Count                      | 13.7                    | 34.4    | 5.1                  | 1.3     | 7.5           | 62.0   |
|                                        |       | % within<br>source of<br>infection     | 21.0%                   | 61.3%   | 3.2%                 | 8.1%    | 6.5%          | 100.0% |
|                                        |       | % within<br>contact made<br>with water | 9.5%                    | 11.0%   | 3.9%                 | 38.5%   | 5.3%          | 10.0%  |
|                                        |       | % of Total                             | 2.1%                    | 6.1%    | .3%                  | .8%     | .6%           | 10.0%  |
| food                                   |       | Count                                  | 16                      | 26      | 1                    | 4       | 6             | 53     |
|                                        |       | Expected<br>Count                      | 11.7                    | 29.4    | 4.4                  | 1.1     | 6.4           | 53.0   |
|                                        |       | % within<br>source of<br>infection     | 30.2%                   | 49.1%   | 1.9%                 | 7.5%    | 11.3%         | 100.0% |
|                                        |       | % within<br>contact made<br>with water | 11.7%                   | 7.6%    | 2.0%                 | 30.8%   | 8.0%          | 8.5%   |
|                                        |       | % of Total                             | 2.6%                    | 4.2%    | .2%                  | .6%     | 1.0%          | 8.5%   |
|                                        |       | Count                                  | 79                      | 216     | 41                   | 2       | 47            | 385    |

|              |                                  |        |        |        |        |        |        |
|--------------|----------------------------------|--------|--------|--------|--------|--------|--------|
| i don't know | Expected Count                   | 85.1   | 213.6  | 31.7   | 8.1    | 46.6   | 385.0  |
|              | % within source of infection     | 20.5%  | 56.1%  | 10.6%  | .5%    | 12.2%  | 100.0% |
|              | % within contact made with water | 57.7%  | 62.8%  | 80.4%  | 15.4%  | 62.7%  | 62.1%  |
|              | % of Total                       | 12.7%  | 34.8%  | 6.6%   | .3%    | 7.6%   | 62.1%  |
| Total        | Count                            | 137    | 344    | 51     | 13     | 75     | 620    |
|              | Expected Count                   | 137.0  | 344.0  | 51.0   | 13.0   | 75.0   | 620.0  |
|              | % within source of infection     | 22.1%  | 55.5%  | 8.2%   | 2.1%   | 12.1%  | 100.0% |
|              | % within contact made with water | 100.0% | 100.0% | 100.0% | 100.0% | 100.0% | 100.0% |
|              | % of Total                       | 22.1%  | 55.5%  | 8.2%   | 2.1%   | 12.1%  | 100.0% |

#### Chi-Square Tests

|                              | Value               | df | Asymp. Sig. (2-sided) |
|------------------------------|---------------------|----|-----------------------|
| Pearson Chi-Square           | 13.115 <sup>a</sup> | 9  | .157                  |
| Likelihood Ratio             | 12.277              | 9  | .198                  |
| Linear-by-Linear Association | 5.246               | 1  | .022                  |
| N of Valid Cases             | 620                 |    |                       |

a. 4 cells (25.0%) have expected count less than 5. The minimum expected count is .26.

**source of infection \* contact made with water**

|                                            |                               | mother complete primary education          |       |        |        |
|--------------------------------------------|-------------------------------|--------------------------------------------|-------|--------|--------|
|                                            |                               | yes                                        | no    | Total  |        |
| source of infection                        | water                         | Count                                      | 98    | 22     | 120    |
|                                            |                               | Expected Count                             | 83.6  | 36.4   | 120.0  |
|                                            |                               | % within source of infection               | 81.7% | 18.3%  | 100.0% |
|                                            |                               | % within mother complete primary education | 22.7% | 11.7%  | 19.4%  |
|                                            |                               | % of Total                                 | 15.8% | 3.5%   | 19.4%  |
|                                            | playing with infected friends | Count                                      | 40    | 22     | 62     |
|                                            |                               | Expected Count                             | 43.2  | 18.8   | 62.0   |
|                                            |                               | % within source of infection               | 64.5% | 35.5%  | 100.0% |
|                                            |                               | % within mother complete primary education | 9.3%  | 11.7%  | 10.0%  |
|                                            |                               | % of Total                                 | 6.5%  | 3.5%   | 10.0%  |
|                                            | food                          | Count                                      | 43    | 10     | 53     |
|                                            |                               | Expected Count                             | 36.9  | 16.1   | 53.0   |
| % within source of infection               |                               | 81.1%                                      | 18.9% | 100.0% |        |
| % within mother complete primary education |                               | 10.0%                                      | 5.3%  | 8.5%   |        |
| % of Total                                 |                               | 6.9%                                       | 1.6%  | 8.5%   |        |
| i don't know                               | Count                         | 251                                        | 134   | 385    |        |
|                                            | Expected Count                | 268.3                                      | 116.7 | 385.0  |        |
|                                            | % within source of infection  | 65.2%                                      | 34.8% | 100.0% |        |



|       |                                            |        |        |        |
|-------|--------------------------------------------|--------|--------|--------|
|       | % within mother complete primary education | 58.1%  | 71.3%  | 62.1%  |
|       | % of Total                                 | 40.5%  | 21.6%  | 62.1%  |
| Total | Count                                      | 432    | 188    | 620    |
|       | Expected Count                             | 432.0  | 188.0  | 620.0  |
|       | % within source of infection               | 69.7%  | 30.3%  | 100.0% |
|       | % within mother complete primary education | 100.0% | 100.0% | 100.0% |
|       | % of Total                                 | 69.7%  | 30.3%  | 100.0% |

#### Chi-Square Tests

|                              | Value               | df | Asymp. Sig. (2-sided) |
|------------------------------|---------------------|----|-----------------------|
| Pearson Chi-Square           | 36.441 <sup>a</sup> | 12 | .000                  |
| Likelihood Ratio             | 32.686              | 12 | .001                  |
| Linear-by-Linear Association | .003                | 1  | .958                  |
| N of Valid Cases             | 620                 |    |                       |

a. 4 cells (20.0%) have expected count less than 5. The minimum expected count is 1.11.

**source of infection \* mother complete primary education**

### Chi-Square Tests

|                              | Value               | df | Asymp. Sig. (2-sided) |
|------------------------------|---------------------|----|-----------------------|
| Pearson Chi-Square           | 15.899 <sup>a</sup> | 3  | .001                  |
| Likelihood Ratio             | 16.908              | 3  | .001                  |
| Linear-by-Linear Association | 9.465               | 1  | .002                  |
| N of Valid Cases             | 620                 |    |                       |

a. 0 cells (.0%) have expected count less than 5. The minimum expected count is 16.07.

**source of infection \* father complete primary education**

Crosstab

|                     |                               |                                            | father complete primary education |       |        |
|---------------------|-------------------------------|--------------------------------------------|-----------------------------------|-------|--------|
|                     |                               |                                            | yes                               | no    | Total  |
| source of infection | water                         | Count                                      | 104                               | 16    | 120    |
|                     |                               | Expected Count                             | 92.3                              | 27.7  | 120.0  |
|                     |                               | % within source of infection               | 86.7%                             | 13.3% | 100.0% |
|                     |                               | % within father complete primary education | 21.8%                             | 11.2% | 19.4%  |
|                     |                               | % of Total                                 | 16.8%                             | 2.6%  | 19.4%  |
|                     | playing with infected friends | Count                                      | 51                                | 11    | 62     |
|                     |                               | Expected Count                             | 47.7                              | 14.3  | 62.0   |
|                     |                               | % within source of infection               | 82.3%                             | 17.7% | 100.0% |
|                     |                               | % within father complete primary education | 10.7%                             | 7.7%  | 10.0%  |
|                     |                               | % of Total                                 | 8.2%                              | 1.8%  | 10.0%  |
|                     | food                          | Count                                      | 46                                | 7     | 53     |
|                     |                               | Expected Count                             | 40.8                              | 12.2  | 53.0   |
|                     |                               | % within source of infection               | 86.8%                             | 13.2% | 100.0% |
|                     |                               | % within father complete primary education | 9.6%                              | 4.9%  | 8.5%   |
|                     |                               | % of Total                                 | 7.4%                              | 1.1%  | 8.5%   |
|                     | i don't know                  | Count                                      | 276                               | 109   | 385    |
|                     |                               | Expected Count                             | 296.2                             | 88.8  | 385.0  |

|       |                                            |        |        |        |
|-------|--------------------------------------------|--------|--------|--------|
|       | % within source of infection               | 71.7%  | 28.3%  | 100.0% |
|       | % within father complete primary education | 57.9%  | 76.2%  | 62.1%  |
|       | % of Total                                 | 44.5%  | 17.6%  | 62.1%  |
| Total | Count                                      | 477    | 143    | 620    |
|       | Expected Count                             | 477.0  | 143.0  | 620.0  |
|       | % within source of infection               | 76.9%  | 23.1%  | 100.0% |
|       | % within father complete primary education | 100.0% | 100.0% | 100.0% |
|       | % of Total                                 | 76.9%  | 23.1%  | 100.0% |

#### Chi-Square Tests

|                              | Value               | df | Asymp. Sig. (2-sided) |
|------------------------------|---------------------|----|-----------------------|
| Pearson Chi-Square           | 16.269 <sup>a</sup> | 3  | .001                  |
| Likelihood Ratio             | 17.266              | 3  | .001                  |
| Linear-by-Linear Association | 13.487              | 1  | .000                  |
| N of Valid Cases             | 620                 |    |                       |

a. 0 cells (.0%) have expected count less than 5. The minimum expected count is 12.22.

**source of infection \* mother's occupation**

Crosstab

|                     |                               |                              | mother's occupation |         |               |            |        |
|---------------------|-------------------------------|------------------------------|---------------------|---------|---------------|------------|--------|
|                     |                               |                              | trading             | farming | salary earner | unemployed | Total  |
| source of infection | water                         | Count                        | 65                  | 18      | 26            | 11         | 120    |
|                     |                               | Expected Count               | 56.3                | 26.7    | 25.0          | 12.0       | 120.0  |
|                     |                               | % within source of infection | 54.2%               | 15.0%   | 21.7%         | 9.2%       | 100.0% |
|                     |                               | % within mother's occupation | 22.3%               | 13.0%   | 20.2%         | 17.7%      | 19.4%  |
|                     |                               | % of Total                   | 10.5%               | 2.9%    | 4.2%          | 1.8%       | 19.4%  |
|                     | playing with infected friends | Count                        | 27                  | 13      | 18            | 4          | 62     |
|                     |                               | Expected Count               | 29.1                | 13.8    | 12.9          | 6.2        | 62.0   |
|                     |                               | % within source of infection | 43.5%               | 21.0%   | 29.0%         | 6.5%       | 100.0% |
|                     |                               | % within mother's occupation | 9.3%                | 9.4%    | 14.0%         | 6.5%       | 10.0%  |
|                     |                               | % of Total                   | 4.4%                | 2.1%    | 2.9%          | .6%        | 10.0%  |
|                     | food                          | Count                        | 28                  | 5       | 13            | 7          | 53     |
|                     |                               | Expected Count               | 24.9                | 11.8    | 11.0          | 5.3        | 53.0   |
|                     |                               | % within source of infection | 52.8%               | 9.4%    | 24.5%         | 13.2%      | 100.0% |
|                     |                               | % within mother's occupation | 9.6%                | 3.6%    | 10.1%         | 11.3%      | 8.5%   |
|                     |                               | % of Total                   | 4.5%                | .8%     | 2.1%          | 1.1%       | 8.5%   |
|                     | i don't know                  | Count                        | 171                 | 102     | 72            | 40         | 385    |

|       |                              |        |        |        |        |        |
|-------|------------------------------|--------|--------|--------|--------|--------|
|       | Expected Count               | 180.7  | 85.7   | 80.1   | 38.5   | 385.0  |
|       | % within source of infection | 44.4%  | 26.5%  | 18.7%  | 10.4%  | 100.0% |
|       | % within mother's occupation | 58.8%  | 73.9%  | 55.8%  | 64.5%  | 62.1%  |
|       | % of Total                   | 27.6%  | 16.5%  | 11.6%  | 6.5%   | 62.1%  |
| Total | Count                        | 291    | 138    | 129    | 62     | 620    |
|       | Expected Count               | 291.0  | 138.0  | 129.0  | 62.0   | 620.0  |
|       | % within source of infection | 46.9%  | 22.3%  | 20.8%  | 10.0%  | 100.0% |
|       | % within mother's occupation | 100.0% | 100.0% | 100.0% | 100.0% | 100.0% |
|       | % of Total                   | 46.9%  | 22.3%  | 20.8%  | 10.0%  | 100.0% |

|                               |       |                              | father's occupation |         |         |               |             | Total  |
|-------------------------------|-------|------------------------------|---------------------|---------|---------|---------------|-------------|--------|
|                               |       |                              | fishing             | farming | trading | salary earner | wage earner |        |
| source of infection           | water | Count                        | 2                   | 48      | 34      | 29            | 7           | 120    |
|                               |       | Expected Count               | 2.9                 | 50.9    | 31.2    | 25.5          | 9.5         | 120.0  |
|                               |       | % within source of infection | 1.7%                | 40.0%   | 28.3%   | 24.2%         | 5.8%        | 100.0% |
|                               |       | % within father's occupation | 13.3%               | 18.3%   | 21.1%   | 22.0%         | 14.3%       | 19.4%  |
|                               |       | % of Total                   | 1.3%                | 7.7%    | 5.5%    | 4.7%          | 1.1%        | 19.4%  |
| playing with infected friends |       | Count                        | 7                   | 21      | 17      | 11            | 6           | 62     |
|                               |       | Expected Count               | 1.5                 | 26.3    | 16.1    | 13.2          | 4.9         | 62.0   |
|                               |       | % within source of infection | 11.3%               | 33.9%   | 27.4%   | 17.7%         | 9.7%        | 100.0% |
|                               |       | % within father's occupation | 46.7%               | 8.0%    | 10.6%   | 8.3%          | 12.2%       | 10.0%  |
|                               |       | % of Total                   | 1.1%                | 3.4%    | 2.7%    | 1.8%          | 1.0%        | 10.0%  |
| food                          |       | Count                        | 1                   | 16      | 16      | 15            | 5           | 53     |
|                               |       | Expected Count               | 1.3                 | 22.5    | 13.8    | 11.3          | 4.2         | 53.0   |
|                               |       | % within source of infection | 1.9%                | 30.2%   | 30.2%   | 28.3%         | 9.4%        | 100.0% |
|                               |       | % within father's occupation | 6.7%                | 6.1%    | 9.9%    | 11.4%         | 10.2%       | 8.5%   |
|                               |       | % of Total                   | 0.2%                | 2.6%    | 2.6%    | 2.4%          | 0.8%        | 8.5%   |
| Count                         |       |                              | 5                   | 178     | 94      | 77            | 31          | 385    |

|              |                              |        |        |        |        |        |        |
|--------------|------------------------------|--------|--------|--------|--------|--------|--------|
| i don't know | Expected Count               | 9.3    | 163.3  | 100.0  | 82.0   | 30.4   | 385.0  |
|              | % within source of infection | 1.3%   | 46.2%  | 24.4%  | 20.0%  | 8.1%   | 100.0% |
|              | % within father's occupation | 33.3%  | 67.7%  | 58.4%  | 58.3%  | 63.3%  | 62.1%  |
|              | % of Total                   | .8%    | 28.7%  | 15.2%  | 12.4%  | 5.0%   | 62.1%  |
| Total        | Count                        | 15     | 263    | 161    | 132    | 49     | 620    |
|              | Expected Count               | 15.0   | 263.0  | 161.0  | 132.0  | 49.0   | 620.0  |
|              | % within source of infection | 2.4%   | 42.4%  | 26.0%  | 21.3%  | 7.9%   | 100.0% |
|              | % within father's occupation | 100.0% | 100.0% | 100.0% | 100.0% | 100.0% | 100.0% |
|              | % of Total                   | 2.4%   | 42.4%  | 26.0%  | 21.3%  | 7.9%   | 100.0% |

#### Chi-Square Tests

|                              | Value               | df | Asymp. Sig. (2-sided) |
|------------------------------|---------------------|----|-----------------------|
| Pearson Chi-Square           | 17.007 <sup>a</sup> | 9  | .049                  |
| Likelihood Ratio             | 18.078              | 9  | .034                  |
| Linear-by-Linear Association | .451                | 1  | .502                  |
| N of Valid Cases             | 620                 |    |                       |

a. 0 cells (.0%) have expected count less than 5. The minimum expected count is 5.30.

**source of infection \* father's occupation**



## Crosstab

|                     |                               |                              | sex   |        | Total  |
|---------------------|-------------------------------|------------------------------|-------|--------|--------|
|                     |                               |                              | male  | female |        |
| source of infection | water                         | Count                        | 72    | 48     | 120    |
|                     |                               | Expected Count               | 70.1  | 49.9   | 120.0  |
|                     |                               | % within source of infection | 60.0% | 40.0%  | 100.0% |
|                     |                               | % within sex                 | 19.9% | 18.6%  | 19.4%  |
|                     |                               | % of Total                   | 11.6% | 7.7%   | 19.4%  |
|                     | playing with infected friends | Count                        | 39    | 23     | 62     |
|                     |                               | Expected Count               | 36.2  | 25.8   | 62.0   |
|                     |                               | % within source of infection | 62.9% | 37.1%  | 100.0% |
|                     |                               | % within sex                 | 10.8% | 8.9%   | 10.0%  |
|                     |                               | % of Total                   | 6.3%  | 3.7%   | 10.0%  |
|                     | food                          | Count                        | 31    | 22     | 53     |
|                     |                               | Expected Count               | 30.9  | 22.1   | 53.0   |
|                     |                               | % within source of infection | 58.5% | 41.5%  | 100.0% |
|                     |                               | % within sex                 | 8.6%  | 8.5%   | 8.5%   |
|                     |                               | % of Total                   | 5.0%  | 3.5%   | 8.5%   |
|                     | i don't know                  | Count                        | 220   | 165    | 385    |
|                     |                               | Expected Count               | 224.8 | 160.2  | 385.0  |
|                     |                               | % within source of infection | 57.1% | 42.9%  | 100.0% |
|                     |                               | % within sex                 | 60.8% | 64.0%  | 62.1%  |
|                     |                               | % of Total                   | 35.5% | 26.6%  | 62.1%  |
| Total               |                               | Count                        | 362   | 258    | 620    |
|                     |                               | Expected Count               | 362.0 | 258.0  | 620.0  |

|  |                              |        |        |        |
|--|------------------------------|--------|--------|--------|
|  | % within source of infection | 58.4%  | 41.6%  | 100.0% |
|  | % within sex                 | 100.0% | 100.0% | 100.0% |
|  | % of Total                   | 58.4%  | 41.6%  | 100.0% |

**Chi-Square Tests**

|                              | Value               | df | Asymp. Sig. (2-sided) |
|------------------------------|---------------------|----|-----------------------|
| Pearson Chi-Square           | 31.385 <sup>a</sup> | 12 | .002                  |
| Likelihood Ratio             | 22.403              | 12 | .033                  |
| Linear-by-Linear Association | .117                | 1  | .732                  |
| N of Valid Cases             | 620                 |    |                       |

a. 5 cells (25.0%) have expected count less than 5. The minimum expected count is 1.28.

**source of infection \* sex**

**Chi-Square Tests**

|                              | Value             | df | Asymp. Sig. (2-sided) |
|------------------------------|-------------------|----|-----------------------|
| Pearson Chi-Square           | .894 <sup>a</sup> | 3  | .827                  |
| Likelihood Ratio             | .901              | 3  | .825                  |
| Linear-by-Linear Association | .589              | 1  | .443                  |
| N of Valid Cases             | 620               |    |                       |

### Chi-Square Tests

|                              | Value             | df | Asymp. Sig. (2-sided) |
|------------------------------|-------------------|----|-----------------------|
| Pearson Chi-Square           | .894 <sup>a</sup> | 3  | .827                  |
| Likelihood Ratio             | .901              | 3  | .825                  |
| Linear-by-Linear Association | .589              | 1  | .443                  |

a. 0 cells (.0%) have expected count less than 5. The minimum expected count is 22.05.

**source of infection \* Age distribution**

Crosstab

|                     |                               |                              | Age distribution |       |         |         |        |        |
|---------------------|-------------------------------|------------------------------|------------------|-------|---------|---------|--------|--------|
|                     |                               |                              | <_4              | 5 - 9 | 10 - 14 | 15 - 19 | >_20   | Total  |
| source of infection | water                         | Count                        | 2                | 24    | 59      | 33      | 2      | 120    |
|                     |                               | Expected Count               | 3.3              | 30.2  | 52.3    | 32.5    | 1.7    | 120.0  |
|                     |                               | % within source of infection | 1.7%             | 20.0% | 49.2%   | 27.5%   | 1.7%   | 100.0% |
|                     |                               | % within Age distribution    | 11.8%            | 15.4% | 21.9%   | 19.6%   | 22.2%  | 19.4%  |
|                     |                               | % of Total                   | .3%              | 3.9%  | 9.5%    | 5.3%    | .3%    | 19.4%  |
|                     | playing with infected friends | Count                        | 1                | 13    | 27      | 20      | 1      | 62     |
|                     |                               | Expected Count               | 1.7              | 15.6  | 27.0    | 16.8    | .9     | 62.0   |
|                     |                               | % within source of infection | 1.6%             | 21.0% | 43.5%   | 32.3%   | 1.6%   | 100.0% |
|                     |                               | % within Age distribution    | 5.9%             | 8.3%  | 10.0%   | 11.9%   | 11.1%  | 10.0%  |
|                     |                               | % of Total                   | .2%              | 2.1%  | 4.4%    | 3.2%    | .2%    | 10.0%  |
|                     | food                          | Count                        | 0                | 13    | 29      | 11      | 0      | 53     |
|                     |                               | Expected Count               | 1.5              | 13.3  | 23.1    | 14.4    | .8     | 53.0   |
|                     |                               | % within source of infection | .0%              | 24.5% | 54.7%   | 20.8%   | .0%    | 100.0% |
|                     |                               | % within Age distribution    | .0%              | 8.3%  | 10.7%   | 6.5%    | .0%    | 8.5%   |
|                     |                               | % of Total                   | .0%              | 2.1%  | 4.7%    | 1.8%    | .0%    | 8.5%   |
| i don't know        | Count                         | 14                           | 106              | 155   | 104     | 6       | 385    |        |
|                     | Expected Count                | 10.6                         | 96.9             | 167.7 | 104.3   | 5.6     | 385.0  |        |
|                     | % within source of infection  | 3.6%                         | 27.5%            | 40.3% | 27.0%   | 1.6%    | 100.0% |        |

|       |                              |        |        |        |        |        |        |
|-------|------------------------------|--------|--------|--------|--------|--------|--------|
|       | % within Age distribution    | 82.4%  | 67.9%  | 57.4%  | 61.9%  | 66.7%  | 62.1%  |
|       | % of Total                   | 2.3%   | 17.1%  | 25.0%  | 16.8%  | 1.0%   | 62.1%  |
| Total | Count                        | 17     | 156    | 270    | 168    | 9      | 620    |
|       | Expected Count               | 17.0   | 156.0  | 270.0  | 168.0  | 9.0    | 620.0  |
|       | % within source of infection | 2.7%   | 25.2%  | 43.5%  | 27.1%  | 1.5%   | 100.0% |
|       | % within Age distribution    | 100.0% | 100.0% | 100.0% | 100.0% | 100.0% | 100.0% |
|       | % of Total                   | 2.7%   | 25.2%  | 43.5%  | 27.1%  | 1.5%   | 100.0% |
|       |                              |        |        |        |        |        |        |

|                                |                                         |                                         | main source of water supply |       |       |        | Total  |
|--------------------------------|-----------------------------------------|-----------------------------------------|-----------------------------|-------|-------|--------|--------|
|                                |                                         |                                         | tap                         | well  | river | others |        |
| route of schistosome infection | contact with contaminated natural water | Count                                   | 23                          | 74    | 30    | 1      | 128    |
|                                |                                         | Expected Count                          | 14.7                        | 63.8  | 48.9  | .6     | 128.0  |
|                                |                                         | % within route of schistosome infection | 18.0%                       | 57.8% | 23.4% | .8%    | 100.0% |
|                                |                                         | % within main source of water supply    | 32.4%                       | 23.9% | 12.7% | 33.3%  | 20.6%  |
|                                |                                         | % of Total                              | 3.7%                        | 11.9% | 4.8%  | .2%    | 20.6%  |
| eating unhygienic food         |                                         | Count                                   | 9                           | 17    | 14    | 0      | 40     |
|                                |                                         | Expected Count                          | 4.6                         | 19.9  | 15.3  | .2     | 40.0   |
|                                |                                         | % within route of schistosome infection | 22.5%                       | 42.5% | 35.0% | .0%    | 100.0% |
|                                |                                         | % within main source of water supply    | 12.7%                       | 5.5%  | 5.9%  | .0%    | 6.5%   |
|                                |                                         | % of Total                              | 1.5%                        | 2.7%  | 2.3%  | .0%    | 6.5%   |
| playing with soil              |                                         | Count                                   | 5                           | 20    | 20    | 0      | 45     |
|                                |                                         | Expected Count                          | 5.2                         | 22.4  | 17.2  | .2     | 45.0   |
|                                |                                         | % within route of schistosome infection | 11.1%                       | 44.4% | 44.4% | .0%    | 100.0% |
|                                |                                         | % within main source of water supply    | 7.0%                        | 6.5%  | 8.4%  | .0%    | 7.3%   |
|                                |                                         | % of Total                              | .8%                         | 3.2%  | 3.2%  | .0%    | 7.3%   |
| i don't know                   |                                         | Count                                   | 34                          | 198   | 173   | 2      | 407    |

|       |                                         |        |        |        |        |        |
|-------|-----------------------------------------|--------|--------|--------|--------|--------|
|       | Expected Count                          | 46.6   | 202.8  | 155.6  | 2.0    | 407.0  |
|       | % within route of schistosome infection | 8.4%   | 48.6%  | 42.5%  | .5%    | 100.0% |
|       | % within main source of water supply    | 47.9%  | 64.1%  | 73.0%  | 66.7%  | 65.6%  |
|       | % of Total                              | 5.5%   | 31.9%  | 27.9%  | .3%    | 65.6%  |
| Total | Count                                   | 71     | 309    | 237    | 3      | 620    |
|       | Expected Count                          | 71.0   | 309.0  | 237.0  | 3.0    | 620.0  |
|       | % within route of schistosome infection | 11.5%  | 49.8%  | 38.2%  | .5%    | 100.0% |
|       | % within main source of water supply    | 100.0% | 100.0% | 100.0% | 100.0% | 100.0% |
|       | % of Total                              | 11.5%  | 49.8%  | 38.2%  | .5%    | 100.0% |

### Chi-Square Tests

|                              | Value               | df | Asymp. Sig. (2-sided) |
|------------------------------|---------------------|----|-----------------------|
| Pearson Chi-Square           | 11.541 <sup>a</sup> | 12 | .483                  |
| Likelihood Ratio             | 13.795              | 12 | .314                  |
| Linear-by-Linear Association | 2.848               | 1  | .092                  |
| N of Valid Cases             | 620                 |    |                       |

a. 6 cells (30.0%) have expected count less than 5. The minimum expected count is .77.

**route of schistosome infection \* main source of water supply**

**Chi-Square Tests**

|                              | Value               | df | Asymp. Sig. (2-sided) |
|------------------------------|---------------------|----|-----------------------|
| Pearson Chi-Square           | 25.354 <sup>a</sup> | 9  | .003                  |
| Likelihood Ratio             | 25.481              | 9  | .002                  |
| Linear-by-Linear Association | 19.264              | 1  | .000                  |
| N of Valid Cases             | 620                 |    |                       |

a. 5 cells (31.3%) have expected count less than 5. The minimum expected count is .19.

**route of schistosome infection \* contact made with water**



|                                |                                         |                                         | contact made with water |         |                   |         |            | Total  |
|--------------------------------|-----------------------------------------|-----------------------------------------|-------------------------|---------|-------------------|---------|------------|--------|
|                                |                                         |                                         | play or bath            | washing | agricultural work | fishing | no contact |        |
| route of schistosome infection | contact with contaminated natural water | Count                                   | 30                      | 58      | 10                | 1       | 29         | 128    |
|                                |                                         | Expected Count                          | 28.3                    | 71.0    | 10.5              | 2.7     | 15.5       | 128.0  |
|                                |                                         | % within route of schistosome infection | 23.4%                   | 45.3%   | 7.8%              | .8%     | 22.7%      | 100.0% |
|                                |                                         | % within contact made with water        | 21.9%                   | 16.9%   | 19.6%             | 7.7%    | 38.7%      | 20.6%  |
|                                |                                         | % of Total                              | 4.8%                    | 9.4%    | 1.6%              | .2%     | 4.7%       | 20.6%  |
| eating unhygienic food         |                                         | Count                                   | 11                      | 22      | 1                 | 3       | 3          | 40     |
|                                |                                         | Expected Count                          | 8.8                     | 22.2    | 3.3               | .8      | 4.8        | 40.0   |
|                                |                                         | % within route of schistosome infection | 27.5%                   | 55.0%   | 2.5%              | 7.5%    | 7.5%       | 100.0% |
|                                |                                         | % within contact made with water        | 8.0%                    | 6.4%    | 2.0%              | 23.1%   | 4.0%       | 6.5%   |
|                                |                                         | % of Total                              | 1.8%                    | 3.5%    | .2%               | .5%     | .5%        | 6.5%   |
| playing with soil              |                                         | Count                                   | 9                       | 30      | 3                 | 2       | 1          | 45     |
|                                |                                         | Expected Count                          | 9.9                     | 25.0    | 3.7               | .9      | 5.4        | 45.0   |
|                                |                                         | % within route of                       | 20.0%                   | 66.7%   | 6.7%              | 4.4%    | 2.2%       | 100.0% |

|              |                                         |        |        |        |        |        |        |
|--------------|-----------------------------------------|--------|--------|--------|--------|--------|--------|
|              | schistosome infection                   |        |        |        |        |        |        |
|              | % within contact made with water        | 6.6%   | 8.7%   | 5.9%   | 15.4%  | 1.3%   | 7.3%   |
|              | % of Total                              | 1.5%   | 4.8%   | .5%    | .3%    | .2%    | 7.3%   |
| i don't know | Count                                   | 87     | 234    | 37     | 7      | 42     | 407    |
|              | Expected Count                          | 89.9   | 225.8  | 33.5   | 8.5    | 49.2   | 407.0  |
|              | % within route of schistosome infection | 21.4%  | 57.5%  | 9.1%   | 1.7%   | 10.3%  | 100.0% |
|              | % within contact made with water        | 63.5%  | 68.0%  | 72.5%  | 53.8%  | 56.0%  | 65.6%  |
|              | % of Total                              | 14.0%  | 37.7%  | 6.0%   | 1.1%   | 6.8%   | 65.6%  |
| Total        | Count                                   | 137    | 344    | 51     | 13     | 75     | 620    |
|              | Expected Count                          | 137.0  | 344.0  | 51.0   | 13.0   | 75.0   | 620.0  |
|              | % within route of schistosome infection | 22.1%  | 55.5%  | 8.2%   | 2.1%   | 12.1%  | 100.0% |
|              | % within contact made with water        | 100.0% | 100.0% | 100.0% | 100.0% | 100.0% | 100.0% |
|              | % of Total                              | 22.1%  | 55.5%  | 8.2%   | 2.1%   | 12.1%  | 100.0% |

### Chi-Square Tests

|                              | Value               | df | Asymp. Sig. (2-sided) |
|------------------------------|---------------------|----|-----------------------|
| Pearson Chi-Square           | 31.913 <sup>a</sup> | 12 | .001                  |
| Likelihood Ratio             | 29.995              | 12 | .003                  |
| Linear-by-Linear Association | 5.155               | 1  | .023                  |
| N of Valid Cases             | 620                 |    |                       |

a. 6 cells (30.0%) have expected count less than 5. The minimum expected count is .84.

**route of schistosome infection \* mother complete primary education**

Crosstab

|                                |                                         |                                            | mother complete primary education |       |        |
|--------------------------------|-----------------------------------------|--------------------------------------------|-----------------------------------|-------|--------|
|                                |                                         |                                            | yes                               | no    | Total  |
| route of schistosome infection | contact with contaminated natural water | Count                                      | 102                               | 26    | 128    |
|                                |                                         | Expected Count                             | 89.2                              | 38.8  | 128.0  |
|                                |                                         | % within route of schistosome infection    | 79.7%                             | 20.3% | 100.0% |
|                                |                                         | % within mother complete primary education | 23.6%                             | 13.8% | 20.6%  |
|                                |                                         | % of Total                                 | 16.5%                             | 4.2%  | 20.6%  |
|                                | eating unhygienic food                  | Count                                      | 31                                | 9     | 40     |
|                                |                                         | Expected Count                             | 27.9                              | 12.1  | 40.0   |
|                                |                                         | % within route of schistosome infection    | 77.5%                             | 22.5% | 100.0% |
|                                |                                         | % within mother complete primary education | 7.2%                              | 4.8%  | 6.5%   |
|                                |                                         | % of Total                                 | 5.0%                              | 1.5%  | 6.5%   |
|                                | playing with soil                       | Count                                      | 32                                | 13    | 45     |
|                                |                                         | Expected Count                             | 31.4                              | 13.6  | 45.0   |
|                                |                                         | % within route of schistosome infection    | 71.1%                             | 28.9% | 100.0% |
|                                |                                         | % within mother complete primary education | 7.4%                              | 6.9%  | 7.3%   |
|                                |                                         | % of Total                                 | 5.2%                              | 2.1%  | 7.3%   |
|                                | i don't know                            | Count                                      | 267                               | 140   | 407    |

|       |                                            |        |        |        |
|-------|--------------------------------------------|--------|--------|--------|
|       | Expected Count                             | 283.6  | 123.4  | 407.0  |
|       | % within route of schistosome infection    | 65.6%  | 34.4%  | 100.0% |
|       | % within mother complete primary education | 61.8%  | 74.5%  | 65.6%  |
|       | % of Total                                 | 43.1%  | 22.6%  | 65.6%  |
| Total | Count                                      | 432    | 188    | 620    |
|       | Expected Count                             | 432.0  | 188.0  | 620.0  |
|       | % within route of schistosome infection    | 69.7%  | 30.3%  | 100.0% |
|       | % within mother complete primary education | 100.0% | 100.0% | 100.0% |
|       | % of Total                                 | 69.7%  | 30.3%  | 100.0% |

### Chi-Square Tests

|                              | Value               | df | Asymp. Sig. (2-sided) |
|------------------------------|---------------------|----|-----------------------|
| Pearson Chi-Square           | 10.472 <sup>a</sup> | 3  | .015                  |
| Likelihood Ratio             | 10.946              | 3  | .012                  |
| Linear-by-Linear Association | 10.345              | 1  | .001                  |
| N of Valid Cases             | 620                 |    |                       |

a. 0 cells (.0%) have expected count less than 5. The minimum expected count is 12.13.

|                                         |                                         |                                            | father complete primary education |        |        |
|-----------------------------------------|-----------------------------------------|--------------------------------------------|-----------------------------------|--------|--------|
|                                         |                                         |                                            | yes                               | no     | Total  |
| route of schistosome infection          | contact with contaminated natural water | Count                                      | 110                               | 18     | 128    |
|                                         |                                         | Expected Count                             | 98.5                              | 29.5   | 128.0  |
|                                         |                                         | % within route of schistosome infection    | 85.9%                             | 14.1%  | 100.0% |
|                                         |                                         | % within father complete primary education | 23.1%                             | 12.6%  | 20.6%  |
|                                         |                                         | % of Total                                 | 17.7%                             | 2.9%   | 20.6%  |
|                                         | eating unhygienic food                  | Count                                      | 37                                | 3      | 40     |
|                                         |                                         | Expected Count                             | 30.8                              | 9.2    | 40.0   |
|                                         |                                         | % within route of schistosome infection    | 92.5%                             | 7.5%   | 100.0% |
|                                         |                                         | % within father complete primary education | 7.8%                              | 2.1%   | 6.5%   |
|                                         |                                         | % of Total                                 | 6.0%                              | .5%    | 6.5%   |
|                                         | playing with soil                       | Count                                      | 37                                | 8      | 45     |
|                                         |                                         | Expected Count                             | 34.6                              | 10.4   | 45.0   |
|                                         |                                         | % within route of schistosome infection    | 82.2%                             | 17.8%  | 100.0% |
|                                         |                                         | % within father complete primary education | 7.8%                              | 5.6%   | 7.3%   |
|                                         |                                         | % of Total                                 | 6.0%                              | 1.3%   | 7.3%   |
|                                         | i don't know                            | Count                                      | 293                               | 114    | 407    |
| Expected Count                          |                                         | 313.1                                      | 93.9                              | 407.0  |        |
| % within route of schistosome infection |                                         | 72.0%                                      | 28.0%                             | 100.0% |        |

|       |                                            |        |        |        |
|-------|--------------------------------------------|--------|--------|--------|
|       | % within father complete primary education | 61.4%  | 79.7%  | 65.6%  |
|       | % of Total                                 | 47.3%  | 18.4%  | 65.6%  |
| Total | Count                                      | 477    | 143    | 620    |
|       | Expected Count                             | 477.0  | 143.0  | 620.0  |
|       | % within route of schistosome infection    | 76.9%  | 23.1%  | 100.0% |
|       | % within father complete primary education | 100.0% | 100.0% | 100.0% |
|       | % of Total                                 | 76.9%  | 23.1%  | 100.0% |

**route of schistosome infection \* father complete primary education**

|                                |                                         |                                         | mother's occupation |         |               |            | Total  |
|--------------------------------|-----------------------------------------|-----------------------------------------|---------------------|---------|---------------|------------|--------|
|                                |                                         |                                         | trading             | farming | salary earner | unemployed |        |
| route of schistosome infection | contact with contaminated natural water | Count                                   | 65                  | 14      | 30            | 19         | 128    |
|                                |                                         | Expected Count                          | 60.1                | 28.5    | 26.6          | 12.8       | 128.0  |
|                                |                                         | % within route of schistosome infection | 50.8%               | 10.9%   | 23.4%         | 14.8%      | 100.0% |
|                                |                                         | % within mother's occupation            | 22.3%               | 10.1%   | 23.3%         | 30.6%      | 20.6%  |
|                                |                                         | % of Total                              | 10.5%               | 2.3%    | 4.8%          | 3.1%       | 20.6%  |
| eating unhygienic food         |                                         | Count                                   | 23                  | 5       | 11            | 1          | 40     |
|                                |                                         | Expected Count                          | 18.8                | 8.9     | 8.3           | 4.0        | 40.0   |
|                                |                                         | % within route of schistosome infection | 57.5%               | 12.5%   | 27.5%         | 2.5%       | 100.0% |
|                                |                                         | % within mother's occupation            | 7.9%                | 3.6%    | 8.5%          | 1.6%       | 6.5%   |
|                                |                                         | % of Total                              | 3.7%                | .8%     | 1.8%          | .2%        | 6.5%   |
| playing with soil              |                                         | Count                                   | 24                  | 10      | 7             | 4          | 45     |
|                                |                                         | Expected Count                          | 21.1                | 10.0    | 9.4           | 4.5        | 45.0   |
|                                |                                         | % within route of schistosome infection | 53.3%               | 22.2%   | 15.6%         | 8.9%       | 100.0% |
|                                |                                         | % within mother's occupation            | 8.2%                | 7.2%    | 5.4%          | 6.5%       | 7.3%   |
|                                |                                         | % of Total                              | 3.9%                | 1.6%    | 1.1%          | .6%        | 7.3%   |



|              |                                         |        |        |        |        |        |
|--------------|-----------------------------------------|--------|--------|--------|--------|--------|
| i don't know | Count                                   | 179    | 109    | 81     | 38     | 407    |
|              | Expected Count                          | 191.0  | 90.6   | 84.7   | 40.7   | 407.0  |
|              | % within route of schistosome infection | 44.0%  | 26.8%  | 19.9%  | 9.3%   | 100.0% |
|              | % within mother's occupation            | 61.5%  | 79.0%  | 62.8%  | 61.3%  | 65.6%  |
|              | % of Total                              | 28.9%  | 17.6%  | 13.1%  | 6.1%   | 65.6%  |
| Total        | Count                                   | 291    | 138    | 129    | 62     | 620    |
|              | Expected Count                          | 291.0  | 138.0  | 129.0  | 62.0   | 620.0  |
|              | % within route of schistosome infection | 46.9%  | 22.3%  | 20.8%  | 10.0%  | 100.0% |
|              | % within mother's occupation            | 100.0% | 100.0% | 100.0% | 100.0% | 100.0% |
|              | % of Total                              | 46.9%  | 22.3%  | 20.8%  | 10.0%  | 100.0% |

### Chi-Square Tests

|                              | Value               | df | Asymp. Sig. (2-sided) |
|------------------------------|---------------------|----|-----------------------|
| Pearson Chi-Square           | 17.624 <sup>a</sup> | 3  | .001                  |
| Likelihood Ratio             | 19.536              | 3  | .000                  |
| Linear-by-Linear Association | 14.619              | 1  | .000                  |
| N of Valid Cases             | 620                 |    |                       |

a. 0 cells (.0%) have expected count less than 5. The minimum expected count is 9.23.

**route of schistosome infection \* mother's occupation**

|                                |                                         |                                         | father's occupation |         |         |               |             |        |
|--------------------------------|-----------------------------------------|-----------------------------------------|---------------------|---------|---------|---------------|-------------|--------|
|                                |                                         |                                         | fishing             | farming | trading | salary earner | wage earner | Total  |
| route of schistosome infection | contact with contaminated natural water | Count                                   | 1                   | 38      | 34      | 40            | 15          | 128    |
|                                |                                         | Expected Count                          | 3.1                 | 54.3    | 33.2    | 27.3          | 10.1        | 128.0  |
|                                |                                         | % within route of schistosome infection | .8%                 | 29.7%   | 26.6%   | 31.2%         | 11.7%       | 100.0% |
|                                |                                         | % within father's occupation            | 6.7%                | 14.4%   | 21.1%   | 30.3%         | 30.6%       | 20.6%  |
|                                |                                         | % of Total                              | .2%                 | 6.1%    | 5.5%    | 6.5%          | 2.4%        | 20.6%  |
| eating unhygienic food         |                                         | Count                                   | 2                   | 10      | 17      | 10            | 1           | 40     |
|                                |                                         | Expected Count                          | 1.0                 | 17.0    | 10.4    | 8.5           | 3.2         | 40.0   |
|                                |                                         | % within route of schistosome infection | 5.0%                | 25.0%   | 42.5%   | 25.0%         | 2.5%        | 100.0% |
|                                |                                         | % within father's occupation            | 13.3%               | 3.8%    | 10.6%   | 7.6%          | 2.0%        | 6.5%   |
|                                |                                         | % of Total                              | .3%                 | 1.6%    | 2.7%    | 1.6%          | .2%         | 6.5%   |
| playing with soil              |                                         | Count                                   | 5                   | 25      | 13      | 2             | 0           | 45     |
|                                |                                         | Expected Count                          | 1.1                 | 19.1    | 11.7    | 9.6           | 3.6         | 45.0   |
|                                |                                         | % within route of schistosome infection | 11.1%               | 55.6%   | 28.9%   | 4.4%          | .0%         | 100.0% |
|                                |                                         | % within father's occupation            | 33.3%               | 9.5%    | 8.1%    | 1.5%          | .0%         | 7.3%   |
|                                |                                         | % of Total                              | .8%                 | 4.0%    | 2.1%    | .3%           | .0%         | 7.3%   |
| i don't know                   |                                         | Count                                   | 7                   | 190     | 97      | 80            | 33          | 407    |
|                                |                                         | Expected Count                          | 9.8                 | 172.6   | 105.7   | 86.7          | 32.2        | 407.0  |

|       |                                         |        |        |        |        |        |        |
|-------|-----------------------------------------|--------|--------|--------|--------|--------|--------|
|       | % within route of schistosome infection | 1.7%   | 46.7%  | 23.8%  | 19.7%  | 8.1%   | 100.0% |
|       | % within father's occupation            | 46.7%  | 72.2%  | 60.2%  | 60.6%  | 67.3%  | 65.6%  |
|       | % of Total                              | 1.1%   | 30.6%  | 15.6%  | 12.9%  | 5.3%   | 65.6%  |
| Total | Count                                   | 15     | 263    | 161    | 132    | 49     | 620    |
|       | Expected Count                          | 15.0   | 263.0  | 161.0  | 132.0  | 49.0   | 620.0  |
|       | % within route of schistosome infection | 2.4%   | 42.4%  | 26.0%  | 21.3%  | 7.9%   | 100.0% |
|       | % within father's occupation            | 100.0% | 100.0% | 100.0% | 100.0% | 100.0% | 100.0% |
|       | % of Total                              | 2.4%   | 42.4%  | 26.0%  | 21.3%  | 7.9%   | 100.0% |

#### Chi-Square Tests

|                              | Value               | df | Asymp. Sig. (2-sided) |
|------------------------------|---------------------|----|-----------------------|
| Pearson Chi-Square           | 22.858 <sup>a</sup> | 9  | .007                  |
| Likelihood Ratio             | 25.148              | 9  | .003                  |
| Linear-by-Linear Association | .124                | 1  | .725                  |
| N of Valid Cases             | 620                 |    |                       |

a. 2 cells (12.5%) have expected count less than 5. The minimum expected count is 4.00.

**route of schistosome infection \* father's occupation**

### Chi-Square Tests

|                              | Value               | df | Asymp. Sig. (2-sided) |
|------------------------------|---------------------|----|-----------------------|
| Pearson Chi-Square           | 53.957 <sup>a</sup> | 12 | .000                  |
| Likelihood Ratio             | 53.789              | 12 | .000                  |
| Linear-by-Linear Association | 11.214              | 1  | .001                  |
| N of Valid Cases             | 620                 |    |                       |

a. 5 cells (25.0%) have expected count less than 5. The minimum expected count is .97.

**route of schistosome infection \* sex**

Crosstab

|                                         |                                         |                                         | sex   |        |        |
|-----------------------------------------|-----------------------------------------|-----------------------------------------|-------|--------|--------|
|                                         |                                         |                                         | male  | female | Total  |
| route of schistosome infection          | contact with contaminated natural water | Count                                   | 80    | 48     | 128    |
|                                         |                                         | Expected Count                          | 74.7  | 53.3   | 128.0  |
|                                         |                                         | % within route of schistosome infection | 62.5% | 37.5%  | 100.0% |
|                                         |                                         | % within sex                            | 22.1% | 18.6%  | 20.6%  |
|                                         |                                         | % of Total                              | 12.9% | 7.7%   | 20.6%  |
|                                         | eating unhygienic food                  | Count                                   | 22    | 18     | 40     |
|                                         |                                         | Expected Count                          | 23.4  | 16.6   | 40.0   |
|                                         |                                         | % within route of schistosome infection | 55.0% | 45.0%  | 100.0% |
|                                         |                                         | % within sex                            | 6.1%  | 7.0%   | 6.5%   |
|                                         |                                         | % of Total                              | 3.5%  | 2.9%   | 6.5%   |
|                                         | playing with soil                       | Count                                   | 21    | 24     | 45     |
|                                         |                                         | Expected Count                          | 26.3  | 18.7   | 45.0   |
|                                         |                                         | % within route of schistosome infection | 46.7% | 53.3%  | 100.0% |
|                                         |                                         | % within sex                            | 5.8%  | 9.3%   | 7.3%   |
|                                         |                                         | % of Total                              | 3.4%  | 3.9%   | 7.3%   |
|                                         | i don't know                            | Count                                   | 239   | 168    | 407    |
| Expected Count                          |                                         | 237.6                                   | 169.4 | 407.0  |        |
| % within route of schistosome infection |                                         | 58.7%                                   | 41.3% | 100.0% |        |
| % within sex                            |                                         | 66.0%                                   | 65.1% | 65.6%  |        |
|                                         |                                         |                                         |       |        |        |

|       |                                         |        |        |        |
|-------|-----------------------------------------|--------|--------|--------|
|       | % of Total                              | 38.5%  | 27.1%  | 65.6%  |
| Total | Count                                   | 362    | 258    | 620    |
|       | Expected Count                          | 362.0  | 258.0  | 620.0  |
|       | % within route of schistosome infection | 58.4%  | 41.6%  | 100.0% |
|       | % within sex                            | 100.0% | 100.0% | 100.0% |
|       | % of Total                              | 58.4%  | 41.6%  | 100.0% |

#### Chi-Square Tests

|                              | Value              | df | Asymp. Sig. (2-sided) |
|------------------------------|--------------------|----|-----------------------|
| Pearson Chi-Square           | 3.643 <sup>a</sup> | 3  | .303                  |
| Likelihood Ratio             | 3.608              | 3  | .307                  |
| Linear-by-Linear Association | .267               | 1  | .605                  |
| N of Valid Cases             | 620                |    |                       |

a. 0 cells (.0%) have expected count less than 5. The minimum expected count is 16.65.

**route of schistosome infection \* Age distribution**

Crosstab

|                                |                                         |                                         | Age distribution |       |         |         |       |        |
|--------------------------------|-----------------------------------------|-----------------------------------------|------------------|-------|---------|---------|-------|--------|
|                                |                                         |                                         | <_4              | 5 - 9 | 10 - 14 | 15 - 19 | >_20  | Total  |
| route of schistosome infection | contact with contaminated natural water | Count                                   | 8                | 32    | 59      | 29      | 0     | 128    |
|                                |                                         | Expected Count                          | 3.5              | 32.2  | 55.7    | 34.7    | 1.9   | 128.0  |
|                                |                                         | % within route of schistosome infection | 6.2%             | 25.0% | 46.1%   | 22.7%   | .0%   | 100.0% |
|                                |                                         | % within Age distribution               | 47.1%            | 20.5% | 21.9%   | 17.3%   | .0%   | 20.6%  |
|                                |                                         | % of Total                              | 1.3%             | 5.2%  | 9.5%    | 4.7%    | .0%   | 20.6%  |
| eating unhygienic food         |                                         | Count                                   | 0                | 6     | 22      | 11      | 1     | 40     |
|                                |                                         | Expected Count                          | 1.1              | 10.1  | 17.4    | 10.8    | .6    | 40.0   |
|                                |                                         | % within route of schistosome infection | .0%              | 15.0% | 55.0%   | 27.5%   | 2.5%  | 100.0% |
|                                |                                         | % within Age distribution               | .0%              | 3.8%  | 8.1%    | 6.5%    | 11.1% | 6.5%   |
|                                |                                         | % of Total                              | .0%              | 1.0%  | 3.5%    | 1.8%    | .2%   | 6.5%   |
| playing with soil              |                                         | Count                                   | 0                | 8     | 22      | 13      | 2     | 45     |
|                                |                                         | Expected Count                          | 1.2              | 11.3  | 19.6    | 12.2    | .7    | 45.0   |
|                                |                                         | % within route of schistosome infection | .0%              | 17.8% | 48.9%   | 28.9%   | 4.4%  | 100.0% |
|                                |                                         | % within Age distribution               | .0%              | 5.1%  | 8.1%    | 7.7%    | 22.2% | 7.3%   |
|                                |                                         | % of Total                              | .0%              | 1.3%  | 3.5%    | 2.1%    | .3%   | 7.3%   |
| i don't know                   |                                         | Count                                   | 9                | 110   | 167     | 115     | 6     | 407    |
|                                |                                         | Expected Count                          | 11.2             | 102.4 | 177.2   | 110.3   | 5.9   | 407.0  |

|       |                                         |        |        |        |        |        |        |
|-------|-----------------------------------------|--------|--------|--------|--------|--------|--------|
|       | % within route of schistosome infection | 2.2%   | 27.0%  | 41.0%  | 28.3%  | 1.5%   | 100.0% |
|       | % within Age distribution               | 52.9%  | 70.5%  | 61.9%  | 68.5%  | 66.7%  | 65.6%  |
|       | % of Total                              | 1.5%   | 17.7%  | 26.9%  | 18.5%  | 1.0%   | 65.6%  |
| Total | Count                                   | 17     | 156    | 270    | 168    | 9      | 620    |
|       | Expected Count                          | 17.0   | 156.0  | 270.0  | 168.0  | 9.0    | 620.0  |
|       | % within route of schistosome infection | 2.7%   | 25.2%  | 43.5%  | 27.1%  | 1.5%   | 100.0% |
|       | % within Age distribution               | 100.0% | 100.0% | 100.0% | 100.0% | 100.0% | 100.0% |
|       | % of Total                              | 2.7%   | 25.2%  | 43.5%  | 27.1%  | 1.5%   | 100.0% |

#### Chi-Square Tests

|                              | Value               | df | Asymp. Sig. (2-sided) |
|------------------------------|---------------------|----|-----------------------|
| Pearson Chi-Square           | 20.084 <sup>a</sup> | 12 | .066                  |
| Likelihood Ratio             | 22.045              | 12 | .037                  |
| Linear-by-Linear Association | 1.453               | 1  | .228                  |
| N of Valid Cases             | 620                 |    |                       |

a. 6 cells (30.0%) have expected count less than 5. The minimum expected count is .58.
